# Supplementary material for: Sushi barcoding in the UK: another kettle of fish
Source: PeerJ. 2016 Mar 31;4:e1891. doi: 10.7717/peerj.1891 (PMC4824885; doi:10.7717/peerj.1891)
Supplement: Supplemental Information 2 — Sample names, genbank accession numbers and the sequences [file peerj-04-1891-s002.xlsx]

## Sheet: Sheet1
Sold as	BOLD Public Record Barcode Database (% match)	Accession number	Sequence
Tuna (Albacore)	Thunnus alalunga 100%, Thunnus obesus 100%, Thunnus orientalis 99.81%, Thunnus thynnus 99.61%, Thunnus atlanticus 99.03%	KU168615	ATCTACAATGTAATCGTTACGGCCCATGCCTTCGTAATGATTTTCTTTATAGTAATACCAATTATGATTGGAGGATTTGGAAACTGACTTATTCCTCTAATGATCGGAGCCCCCGACATGGCATTCCCACGAATGAACAACATGAGCTTCTGACTCCTTCCTCCCTCTTTCCTTCTGCTCCTAGCTTCTTCAGGAGTTGAGGCTGGGGCCGGAACCGGTTGAACAGTCTACCCTCCCCTTGCCGGCAACCTAGCCCACGCAGGGGCATCAGTTGACCTAACTATTTTCTCACTTCACTTAGCAGGGGTTTCCTCAATTCTTGGGGCAATTAACTTCATCACAACAATTATCAATATGAAACCTGCAGCTATCTCTCAATATCAAACACCACTGTTTGTA…
Tuna (Albacore)	Thunnus alalunga 100%, Thunnus obesus 100%, Thunnus orientalis 99.81%, Thunnus maccoyii 99.81%, Thunnus atlanticus 99.04%	KU168616	GTGCCCTTCTTGGGGACGACCAGATCTACAATGTAATCGTTACGGCCCATGCCTTCGTAATGATTTTCTTTATAGTAATACCAATTATGATTGGAGGATTTGGAAACTGACTTATTCCTCTAATGATCGGAGCCCCCGACATGGCATTCCCACGAATGAACAACATGAGCTTCTGACTCCTTCCTCCCTCTTTCCTTCTGCTCCTAGCTTCTTCAGGAGTTGAGGCTGGGGCCGGAACCGGTTGAACAGTCTACCCTCCCCTTGCCGGCAACCTAGCCCACGCAGGGGCATCAGTTGACCTAACTATTTTCTCACTTCACTTAGCAGGGGTTTCCTCAATTCTTGGGGCAATTAACTTCATCACAACAATTATCAATATGAAACCTGCAGCTATCTCTC…
Tuna (Albacore)	Thunnus alalunga 99.79%, Thunnus obesus 99.38%, Thunnus orientalis 99.17%, Thunnus maccoyii 99.17%, Thunnus thynnus 98.96%, Thunnus albacares 98.33%	KU168617	GGTGCCCTTCTTGGGGACGACCAGATCTACAATGTAATCGTTACGGCCCATGCCTTCGTAATGATTTTCTTTATAGTAATACCAATTATGATTGGAGGATTTGGAAACTGACTTATTCCTCTAATGATCGGAGCCCCCGACATGGCATTCCCACGAATGAACAACATGAGCTTCTGACTCCTTCCTCCCTCTTTCCTTCTGCTCCTAGCTTCTTCAGGAGTTGAGGCTGGGGCCGGAACCGGTTGAACAGTCTACCCTCCCCTTGCCGGCAATCTAGCCCACGCAGGGGCATCAGTTGACCTAACTATTTTCTCACTTCACTTAGCAGGGGTTTCCTCAATTCTTGGGGCAATTAACTTCATTACAACAATTATCAATATGAAACCTGCAGCTATCTCT…
Tuna (Bluefin)	Thunnus thynnus 100%, Thunnus atlanticus 99.67%, Thunnus maccoyii 99.67%, Thunnus albacares 99.6%	KU168618	GGCACGGCCTTAAGCTTGCTCATCCGAGCTGAACTAAGCCAACCAGGTGCCCTTCTTGGGGACGACCAGATCTACAATGTAATCGTTACGGCCCATGCCTTCGTAATGATTTTCTTTATAGTAATACCAATTATGATTGGAGGATTTGGAAACTGACTTATTCCTCTAATGATCGGAGCCCCCGACATGGCATTCCCACGAATGAACAACATGAGCTTCTGACTCCTTCCCCCTTCTTTCCTTCTGCTCCTAGCTTCTTCAGGAGTTGAGGCTGGAGCCGGAACCGGTTGAACAGTCTACCCTCCCCTTGCCGGCAACCTAGCCCACGCAGGGGCATCAGTTGACCTAACTATTTTCTCACTTCACTTAGCGGGGGTTTCCTCAATTCTTGGGGCAATT…
Tuna (Bluefin)	Thunnus albacares 100%, Thunnus atlanticus 100%, Thunnus obesus 100%, Thunnus maccoyii 99.85%	KU168619	ACtGtNtCGGTGCTGAGCTGGATAGTTGGCACGGCCTTAAGCTTGCTCATCCGAGCTGAACTAAGCCAACCNGGTGCCCTTCTTGGGGACGACCAGATCTACAATGTAATCGTTACGGCCCATGCCTTCGTAATGATTTTCTTTATAGTAATACCAATTATGATTGGAGGATTTGGAAACTGACTTATTCCTCTAATGATCGGAGCCCCCGACATGGCATTCCCACGAATGAACAACATGAGCTTCTGACTCCTTCCCCCCTCTTTCCTTCTGCTCCTAGCTTCTTCAGGAGTTGAGGCTGGAGCCGGAACCGGTTGAACAGTCTACCCTCCCCTTGCCGGCAACCTGGCCCACGCAGGGGCATCAGTTGACCTAACTATTTTCTCACTTCACTTAGCA…
Tuna (Yellowfin)	Thunnus albacares 100%, Thunnus obesus 100%, Thunnus maccoyii 99.83%, Thunnus tonggol 99.83%	KU168620	GCTCATCCGAGCTGAACTAAGCCAACCAGGTGCCCTTCTTGGGGACGACCAGATCTACAATGTAATCGTTACGGCCCATGCCTTCGTAATGATTTTCTTTATAGTAATACCAATTATGATTGGAGGATTTGGAAACTGACTTATTCCTCTAATGATCGGAGCCCCCGACATGGCATTCCCACGAATGAACAACATGAGCTTCTGACTCCTTCCCCCCTCTTTCCTTCTGCTCCTAGCTTCTTCAGGAGTTGAGGCTGGAGCCGGAACCGGTTGAACAGTCTACCCTCCCCTTGCCGGCAACCTGGCCCACGCAGGGGCATCAGTTGACCTAACTATTTTCTCACTTCACTTAGCAGGGGTTTCCTCAATTCTTGGGGCAATTAACTTCATCACAACAAT…
Tuna (Yellowfin)	Thunnus albacares 100%, Thunnus atlanticus 100%, Thunnus obesus 100%, Thunnus maccoyii 99.83%, Thunnus tonggol 99.83%	KU168621	GCTCATCCGAGCTGAACTAAGCCAACCAGGTGCCCTTCTTGGGGACGACCAGATCTACAATGTAATCGTTACGGCCCATGCCTTCGTAATGATTTTCTTTATAGTAATACCAATTATGATTGGAGGATTTGGAAACTGACTTATTCCTCTAATGATCGGAGCCCCCGACATGGCATTCCCACGAATGAACAACATGAGCTTCTGACTCCTTCCCCCCTCTTTCCTTCTGCTCCTAGCTTCTTCAGGAGTTGAGGCTGGAGCCGGAACCGGTTGAACAGTCTACCCTCCCCTTGCCGGCAACCTGGCCCACGCAGGGGCATCAGTTGACCTAACTATTTTCTCACTTCACTTAGCAGGGGTTTCCTCAATTCTTGGGGCAATTAACTTCATCACAACAAT…
Tuna (Yellowfin)	Thunnus albacares 100%	KU168622	ATCTACAATGTAATCGTTACGGCCCATGCCTTCGTAATGATTTTCTTTATAGTAATACCAATTATGATTGGAGGATTTGGAAACTGACTTATTCCTCTAATGATCGGAGCCCCCGACATGGCATTCCCACGAATGAACAACATGAGCTTCTGACTCCTTCCCCCCTCTTTCCTTCTGCTCCTAGCTTCTTCAGGAGTTGAGGCTGGAGCCGGAACCGGTTGAACAGTCTACCCTCCCCTTGCCGGCAATCTGGCCCACGCAGGGGCATCAGTTGACCTAACTATTTTCTCACTTCACTTAGCAGGGGTTTCCTCAATTCTTGGGGCAATTAACTTCATCACAACAATTATCAATATGAAACCTGCAGCTATTTCTCAGTATCAAACACCACTGTTTGTA…
Tuna (Yellowfin)	Thunnus albacares 100%, Thunnus atlanticus 99.79%, Thunnus obesus 99.79%, Thunnus maccoyii 99.79%	KU168623	GGTGCCCTTCTTGGGGACGACCAGATCTACAATGTAATCGTTACGGCCCATGCCTTCGTAATGATTTTCTTTATAGTAATACCAATTATGATTGGAGGATTTGGAAACTGACTTATTCCTCTAATGATCGGGGCCCCCGACATGGCATTCCCACGAATGAACAACATGAGCTTCTGACTCCTTCCCCCCTCTTTCCTTCTGCTCCTAGCTTCTTCAGGAGTTGAGGCTGGAGCCGGAACCGGTTGAACAGTCTACCCTCCCCTTGCCGGCAACCTGGCCCACGCAGGGGCATCAGTTGACCTAACTATTTTCTCACTTCACTTAGCAGGGGTTTCCTCAATTCTTGGGGCAATTAACTTCATCACAACAATTATCAATATGAAACCTGCAGCTATTTCT…
Tuna (Yellowfin)	Thunnus obesus 100%, Thunnus albacares 99.69%, Thunnus atlanticus 99.62%, Thunnus tonggol 99.52%, Thunnus maccoyii 99.4%	KU168624	agttgtCGgTGCATGNgcTGGATAGTTGGCACGGCCTTAAGCTTGCTCATCCGAGCTGAACTAAGCCAACCAGGTGCCCTTCTTGGGGACGACCAGATCTACAATGTAATCGTTACGGCCCATGCCTTCGTAATGATTTTCTTTATAGTAATACCAATTATGATTGGAGGATTTGGAAACTGACTTATTCCTCTAATGATCGGAGCCCCCGACATGGCATTCCCACGAATGAACAACATGAGCTTCTGACTCCTTCCCCCCTCTTTCCTTCTGCTTCTAGCTTCTTCAGGAGTTGAGGCTGGAGCCGGAACCGGTTGAACAGTCTACCCTCCCCTTGCCGGCAACCTGGCCCACGCAGGGGCATCAGTTGACCTAACTATTTTCTCACTGCACTTAGCA…
Tuna (Yellowfin)	Thunnus albacares 100%, Thunnus atlanticus 100%, Thunnus maccoyii 100%, Thunnus obesus 100%	KU168625	GGTGCCCTTCTTGGGGACGACCAGATCTACAATGTAATCGTTACGGCCCATGCCTTCGTAATGATTTTCTTTATAGTAATACCAATTATGATTGGAGGATTTGGAAACTGACTTATTCCTCTAATGATCGGAGCCCCCGACATGGCATTCCCACGAATGAACAACATGAGCTTCTGACTCCTTCCCCCCTCTTTCCTTCTGCTCCTAGCTTCTTCAGGAGTTGAGGCTGGAGCCGGAACCGGTTGAACAGTCTACCCTCCCCTTGCCGGCAACCTGGCCCACGCAGGGGCATCAGTTGACCTAACTATTTTCTCACTTCACTTAGCAGGGGTTTCCTCAATTCTTGGGGCAATTAACTTCATCACAACAATTATCAATATGAAACCTGCAGCTATTTCT…
Tuna (Yellowfin)	Thunnus albacares 97.14%, Thunnus atlanticus 96.6%, Thunnus obesus 96.6%	KU168626	TTGCTCATCCGAGCTGAACTAAGCCAACCCGGTGCCCTTCTGGGAGACGACCAAATTTACAATGTAATCGTTACGGCCCATGCCTTCGTAATGATTTTCTTTATAGTAATGCCAATTATGATTGGAGGATTTGGAAACTGACTTATTCCCCTGATGATCGGAGCCCCCGACATGGCATTCCCCCGAATGAACAATATGAGCTTCTGACTCCTTCCCCCCTCTTTCCTTCTGCTCCTAGCTTCTTCAGGAGTTGAGGCTGGAGCCGGAACCGGTTGAACAGTCTACCCTCCCCTTGCCGGCAATCTGGCCCACGCAGGAGCATCAGTTGACCTAACTATTTTCTCCCTTCACTTANCTGGNGTTTCCTCAATTCTTGGAGCNATTAACTTCATCACAACA…
Tuna	Thunnus albacares 100%, Thunnus obesus 99.82%, Thunnus maccoyii 99.67%, Thunnus tonggol 99.67%	KU168627	CTCATCCGAGCTGAACTAAGCCAACCAGGTGCCCTTCTTGGGGACGACCAGATCTACAATGTAATCGTTACGGCCCATGCCTTCGTAATGATTTTCTTTATAGTAATACCAATTATGATTGGAGGATTTGGAAACTGACTTATTCCTCTAATGATCGGAGCCCCCGACATGGCATTCCCACGAATGAACAACATGAGCTTCTGACTCCTTCCCCCCTCTTTCCTTCTGCTCCTAGCTTCTTCAGGAGTTGAGGCTGGAGCCGGAACCGGTTGAACAGTCTACCCTCCCCTTGCCGGCAACCTGGCCCACGCAGGGGCATCAGTTGACCTAACTATTTTCTCACTTCACTTAGCAGGGGTTTCCTCAATTCTTGGGGCAATTAACTTCATCACAACAATT…
Tuna	Thunnus albacares 100% , Thunnus obesus 99.82%, Thunnus maccoyii 99.67%, Thunnus tonggol 99.67%	KU168628	GCCTTAAGCTTGCTCATCCGAGCTGAACTAAGCCAACCAGGTGCCCTTCTTGGGGACGACCAGATCTACAATGTAATCGTTACGGCCCATGCCTTCGTAATGATTTTCTTTATAGTAATACCAATTATGATTGGAGGATTTGGAAACTGACTTATTCCTCTAATGATCGGAGCCCCCGACATGGCATTCCCACGAATGAACAACATGAGCTTCTGACTCCTTCCCCCCTCTTTCCTTCTGCTCCTAGCTTCTTCAGGAGTTGAGGCTGGAGCCGGAACCGGTTGAACAGTCTACCCTCCCCTTGCCGGCAACCTGGCCCACGCAGGGGCATCAGTTGACCTAACTATTTTCTCACTTCACTTAGCAGGGGTTTCCTCAATTCTTGGGGCAATTAACTTC…
Tuna	Thunnus albacares 100%, Thunnus atlanticus 100%, Thunnus obesus 100%, Thunnus maccoyii 99.83%, Thunnus tonggol 99.83%	KU168629	GCTCATCCGAGCTGAACTAAGCCAACCAGGTGCCCTTCTTGGGGACGACCAGATCTACAATGTAATCGTTACGGCCCATGCCTTCGTAATGATTTTCTTTATAGTAATACCAATTATGATTGGAGGATTTGGAAACTGACTTATTCCTCTAATGATCGGAGCCCCCGACATGGCATTCCCACGAATGAACAACATGAGCTTCTGACTCCTTCCCCCCTCTTTCCTTCTGCTCCTAGCTTCTTCAGGAGTTGAGGCTGGAGCCGGAACCGGTTGAACAGTCTACCCTCCCCTTGCCGGCAACCTGGCCCACGCAGGGGCATCAGTTGACCTAACTATTTTCTCACTTCACTTAGCAGGGGTTTCCTCAATTCTTGGGGCAATTAACTTCATCACAACAAT…
Tuna	Thunnus albacares 100%, Thunnus atlanticus 100%, Thunnus obesus 100%, Thunnus maccoyii 99.83%, Thunnus tonggol 99.83%	KU168630	GCTCATCCGAGCTGAACTAAGCCAACCAGGTGCCCTTCTTGGGGACGACCAGATCTACAATGTAATCGTTACGGCCCATGCCTTCGTAATGATTTTCTTTATAGTAATACCAATTATGATTGGAGGATTTGGAAACTGACTTATTCCTCTAATGATCGGAGCCCCCGACATGGCATTCCCACGAATGAACAACATGAGCTTCTGACTCCTTCCCCCCTCTTTCCTTCTGCTCCTAGCTTCTTCAGGAGTTGAGGCTGGAGCCGGAACCGGTTGAACAGTCTACCCTCCCCTTGCCGGCAACCTGGCCCACGCAGGGGCATCAGTTGACCTAACTATTTTCTCACTTCACTTAGCAGGGGTTTCCTCAATTCTTGGGGCAATTAACTTCATCACAACAAT…
Tuna	Thunnus obesus 100%, Thunnus albacares 99.34%	KU168631	GCTCATCCGAGCTGAACTAAGCCAACCAGGTGCCCTTCTTGGGGACGACCAGATCTACAATGTAATCGTTACGGCCCATGCCTTCGTAATGATTTTCTTTATAGTAATACCAATTATGATTGGAGGATTTGGAAACTGACTTATTCCTCTAATGATCGGAGCCCCCGACATGGCATTCCCACGAATGAACAACATGAGCTTCTGACTCCTTCCCCCCTCTTTCCTTCTGCTTCTAGCTTCTTCAGGAGTTGAGGCTGGAGCCGGAACCGGTTGAACAGTATACCCTCCCCTTGCCGGCAACCTGGCCCACGCAGGGGCATCAGTTGACCTAACTATTTTCTCACTGCACTTAGCAGGGGTTTCCTCAATTCTTGGGGCAATTAACTTCATCACAACAAT…
Tuna	Thunnus albacares 99.83%, Thunnus obesus 99.83%	KU168632	TGCTCATCCGAGCTGAACTAAGCCAACCAGGTGCCCTTCTTGGGGACGACCAGATCTACAATGTAATCGTTACGGCCCATGCCTTCGTAATGATTTTCTTTATAGTAATACCAATTATGATTGGAGGATTTGGAAACTGACTTATTCCTCTAATGATCGGAGCCCCCGACATGGCATTCCCACGAATGAACAACATGAGCTTCTGACTCCTTCCCCCCTCTTTCCTTCTGCTCCTAGCTTCTTCAGGAGTTGAGGCTGGAGCCGGAACCGGTTGAACAGTCTACCCTCCCCTTGCCGGCAATCTGGCCCACGCAGGGGCATCAGTTGACCTAACTATTTTCTCACTGCACTTAGCAGGGGTTTCCTCAATTCTTGGGGCAATTAACTTCATCACAACAA…
Tuna	Thunnus albacares 100%, Thunnus atlanticus 100%, Thunnus maccoyii 100%, Thunnus obesus 100%, Thunnus tonggol 99.84%	KU168633	TAGTTGGCACGGCCTTAAGCTTGCTCATCCGAGCTGAACTAAGCCAACCAGGTGCCCTTCTTGGGGACGACCAGATCTACAATGTAATCGTTACGGCCCATGCCTTCGTAATGATTTTCTTTATAGTAATACCAATTATGATTGGAGGATTTGGAAACTGACTTATTCCTCTAATGATCGGAGCCCCCGACATGGCATTCCCACGAATGAACAACATGAGCTTCTGACTCCTTCCCCCCTCTTTCCTTCTGCTCCTAGCTTCTTCAGGAGTTGAGGCTGGAGCCGGAACCGGTTGAACAGTCTACCCTCCCCTTGCCGGCAACCTGGCCCACGCAGGGGCATCAGTTGACCTAACTATTTTCTCACTTCACTTAGCAGGGGTTTCCTCAATTCTTGGGG…
Tuna	Thunnus albacares 100%, Thunnus atlanticus 100%, Thunnus obesus 100%, Thunnus maccoyii 99.84%, Thunnus tonggol 99.83%	KU168634	CTTGCTCATCCGAGCTGAACTAAGCCAACCAGGTGCCCTTCTTGGGGACGACCAGATCTACAATGTAATCGTTACGGCCCATGCCTTCGTAATGATTTTCTTTATAGTAATACCAATTATGATTGGAGGATTTGGAAACTGACTTATTCCTCTAATGATCGGAGCCCCCGACATGGCATTCCCACGAATGAACAACATGAGCTTCTGACTCCTTCCCCCCTCTTTCCTTCTGCTCCTAGCTTCTTCAGGAGTTGAGGCTGGAGCCGGAACCGGTTGAACAGTCTACCCTCCCCTTGCCGGCAACCTGGCCCACGCAGGGGCATCAGTTGACCTAACTATTTTCTCACTTCACTTAGCAGGGGTTTCCTCAATTCTTGGGGCAATTAACTTCATCACAAC…
Tuna	Thunnus albacares 100%, Thunnus atlanticus 99.49%, Thunnus obesus 99.49%, Thunnus maccoyii 99.48	KU168635	TTCGTAATGATTTTCTTTATAGTAATACCAATTATGATTGGAGGATTTGGAAACTGACTTATTCCTCTAATGATCGGAGCCCCCGACATGGCATTCCCACGAATGAACAACATGAGCTTCTGACTCCTTCCCCCCTCTTTCCTTCTGCTCCTAGCTTCTTCAGGAGTTGAGGCTGGAGCCGGAACCGGTTGAACAGTCTACCCTCCCCTTGCCGGCAACCTGGCCCACGCAGGGGCATCAGTTGACCTAACTATTTTCTCACTTCACTTAGCAGGGGTTTCCTCAATTCTTGGGGCAATTAACTTCATCACAACAATTATCAATATGAAGCCTGCAGCCATTTCTCAGTATCAAACACCACTGTTTGTATGAGCTGTACTAATTACAGCTG
Tuna*	Thunnus albacares 100%, Thunnus obesus 100%, Thunnus atlanticus 99.81%, Thunnus maccoyii 99.68%	KU168636	cTgaAgTCTAAgGCACGgccTtaagaATGCTCATCCGAGCTGAACTAAGCCAACCAGGTGCCCTTCTTGGGGACGACCAGATCTACAATGTAATCGTTACGGCCCATGCCTTCGTAATGATTTTCTTTATAGTAATACCAATTATGATTGGAGGATTTGGAAACTGACTTATTCCTCTAATGATCGGAGCCCCCGACATGGCATTCCCACGAATGAACAACATGAGCTTCTGACTCCTTCCCCCCTCTTTCCTTCTGCTCCTAGCTTCTTCAGGAGTTGAGGCTGGAGCCGGAACCGGTTGAACAGTCTACCCTCCCCTTGCCGGCAACCTGGCCCACGCAGGGGCATCAGTTGACCTAACTATTTTCTCACTTCACTTAGCAGGGGTTTCCTCAATTC…
Tuna	Thunnus albacares 100%, Thunnus atlanticus 99.77%, Thunnus obesus 99.77%	KU168637	CCCTTCTTGGGGACGACCAGATCTACAATGTAATCGTTACGGCCCATGCCTTCGTAATGATTTTCTTTATAGTAATACCAATTATGATTGGAGGATTTGGAAACTGACTTATTCCTCTAATGATCGGAGCCCCCGACATGGCATTCCCACGAATGAACAACATGAGCTTCTGACTCCTTCCCCCCTCTTTCCTTCTGCTCCTAGCTTCTTCAGGAGTTGAGGCTGGAGCCGGAACCGGTTGAACAGTCTACCCACCCCTTGCCGGCAACCTGGCCCACGCAGGGGCATCAGTTGACCTAACTATTTTCTCACTTCACTTAGCAGGGGTTTCCTCAATTCTTGGGGCAATTAACTTCATCACAACAATTATCAATATGAAACCTGCAGCTATTTCTCAGT…
Tuna	Thunnus albacares 100%, Thunnus maccoyii 100%, Thunnus obesus 100%	KU168638	GCATGAGCTGGATAGTTGGCACGGCCTTAAGCTTGCTCATCCGAGCTGAACTAAGCCAACCAGGTGCCCTTCTTGGGGACGACCAGATCTACAATGTAATCGTTACGGCCCATGCCTTCGTAATGATTTTCTTTATAGTAATACCAATTATGATTGGAGGATTTGGAAACTGACTTATTCCTCTAATGATCGGAGCCCCCGACATGGCATTCCCACGAATGAACAACATGAGCTTCTGACTCCTTCCCCCCTCTTTCCTTCTGCTCCTAGCTTCTTCAGGAGTTGAGGCTGGAGCCGGAACCGGTTGAACAGTCTACCCTCCCCTTGCCGGCAACCTGGCCCACGCAGGGGCATCAGTTGACCTAACTATTTTCTCACTTCACTTAGCAGGGGTTTCCT…
Tuna	Thunnus albacares 100%, Thunnus atlanticus 100%, Thunnus maccoyii 100%, Thunnus obesus 100%	KU168639	CTGAACTAAGCCAACCAGGTGCCCTTCTTGGGGACGACCAGATCTACAATGTAATCGTTACGGCCCATGCCTTCGTAATGATTTTCTTTATAGTAATACCAATTATGATTGGAGGATTTGGAAACTGACTTATTCCTCTAATGATCGGAGCCCCCGACATGGCATTCCCACGAATGAACAACATGAGCTTCTGACTCCTTCCCCCCTCTTTCCTTCTGCTCCTAGCTTCTTCAGGAGTTGAGGCTGGAGCCGGAACCGGTTGAACAGTCTACCCTCCCCTTGCCGGCAACCTGGCCCACGCAGGGGCATCAGTTGACCTAACTATTTTCTCACTTCACTTAGCAGGGGTTTCCTCAATTCTTGGGGCAATTAACTTCATCACAACAATTATCAATATGA…
Tuna	Seriola lalandi 100%, Seriola zonata 99.36%	KU168640	GGGAGACGATCAAATTTATAACGTAATCGTTACAGCGCACGCGTTTGTAATAATTTTCTTTATAGTAATGCCAATTATGATTGGAGGGTTCGGGAACTGACTCATCCCCTTGATGATTGGGGCTCCCGATATAGCATTCCCCCGAATAAACAATATGAGCTTCTGACTCCTTCCCCCTTCGTTCCTCCTACTTTTAGCCTCTTCAGGCGTTGAAGCCGGGGCCGGAACGGGTTGAACAGTCTACCCGCCTCTAGCCGGCAACCTCGCTCACGCAGGAGCATCCGTAGACTTAACAATTTTCTCCCTTCATTTAGCTGGAATCTCCTCAATTCTAGGAGCTATTAACTTTATTACGACCATCATCAACATGAAACCCCATGCCGTTTCCATGTACCAAAT…
Tuna	Seriola lalandi 100%, Seriola zonata 99.36%	KU168641	GGGAGACGATCAAATTTATAACGTAATCGTTACAGCGCACGCGTTTGTAATAATTTTCTTTATAGTAATGCCAATTATGATTGGAGGGTTCGGGAACTGACTCATCCCCTTGATGATTGGGGCTCCCGATATAGCATTCCCCCGAATAAACAATATGAGCTTCTGACTCCTTCCCCCTTCGTTCCTCCTACTTTTAGCCTCTTCAGGCGTTGAAGCCGGGGCCGGAACGGGTTGAACAGTCTACCCGCCTCTAGCCGGCAACCTCGCTCACGCAGGAGCATCCGTAGACTTAACAATTTTCTCCCTTCATTTAGCTGGAATCTCCTCAATTCTAGGAGCTATTAACTTTATTACGACCATCATCAACATGAAACCCCATGCCGTTTCCATGTACCAAAT…
Tuna	Thunnus albacares 99.82%, Thunnus atlanticus 99.82%, Thunnus maccoyii 99.82%, Thunnus obesus 99.81%	KU168642	GGCCTTAAGCTTGCTCATCCGAGCTGAACTAAGCCAACCAGGTGCCCTTCTTGGGGACGACCAGATCTACAATGTAATCGTTACGGCCCATGCCTTCGTAATGATTTTCTTTATAGTAATACCAATTATGATTGGAGGATTTGGAAACTGACTTATTCCTCTAATGATCGGAGCCCCCGACATGGCATTCCCACGAATGAACAACATGAGCTTCTGACTCCTTCCCCCCTCTTTCCTTCTGCTCCTAGCTTCTTCAGGAGTTGAGGCTGGAGCCGGAACCGGTTGAACAGTCTACCCTCCCCTTGCCGGCAACCTGGCCCACGCAGGGGCATCAGTTGACCTAACTATTTTCTCACTTCACTTAGCAGGGGTTTCCTCAATTCTTGGGGCAATTAACTT…
Tuna	Thunnus albacares 100%, Thunnus atlanticus 99.79%, Thunnus obesus 99.79%, Thunnus maccoyii 99.79%	KU168643	GGTGCCCTTCTTGGGGACGACCAGATCTACAATGTAATCGTTACGGCCCATGCCTTCGTAATGATTTTCTTTATAGTAATACCAATTATGATTGGAGGATTTGGAAACTGACTTATTCCTCTAATGATCGGGGCCCCCGACATGGCATTCCCACGAATGAACAACATGAGCTTCTGACTCCTTCCCCCCTCTTTCCTTCTGCTCCTAGCTTCTTCAGGAGTTGAGGCTGGAGCCGGAACCGGTTGAACAGTCTACCCTCCCCTTGCCGGCAACCTGGCCCACGCAGGGGCATCAGTTGACCTAACTATTTTCTCACTTCACTTAGCAGGGGTTTCCTCAATTCTTGGGGCAATTAACTTCATCACAACAATTATCAATATGAAACCTGCAGCTATTTCT…
Tuna	Thunnus albacares 99.79%, Thunnus atlanticus 99.79%, Thunnus obesus 99.79%, Thunnus maccoyii 99.79%	KU168644	GGTGCCCTTCTTGGGGACGACCAGATCTACAATGTAATCGTTACGGCCCATGCCTTCGTAATGATTTTCTTTATAGTAATACCAATTATGATTGGAGGATTTGGAAACTGACTTATTCCTCTAATGATCGGAGCCCCCGACATGGCATTCCCACGAATGAACAACATGAGCTTCTGACTCCTTCCCCCCTCTTTCCTTCTGCTCCTAGCTTCTTCAGGAGTTGAGGCTGGAGCCGGAACCGGTTGAACAGTGTACCCTCCCCTTGCCGGCAACCTGGCCCACGCAGGGGCATCAGTTGACCTAACTATTTTCTCACTTCACTTAGCAGGGGTTTCCTCAATTCTTGGGGCAATTAACTTCATCACAACAATTATCAATATGAAACCTGCAGCTATTTCT…
Tuna	Thunnus albacares 100%, Thunnus atlanticus 100%, Thunnus maccoyii 100%, Thunnus obesus 100%	KU168645	GGTGCCCTTCTTGGGGACGACCAGATCTACAATGTAATCGTTACGGCCCATGCCTTCGTAATGATTTTCTTTATAGTAATACCAATTATGATTGGAGGATTTGGAAACTGACTTATTCCTCTAATGATCGGAGCCCCCGACATGGCATTCCCACGAATGAACAACATGAGCTTCTGACTCCTTCCCCCCTCTTTCCTTCTGCTCCTAGCTTCTTCAGGAGTTGAGGCTGGAGCCGGAACCGGTTGAACAGTCTACCCTCCCCTTGCCGGCAACCTGGCCCACGCAGGGGCATCAGTTGACCTAACTATTTTCTCACTTCACTTAGCAGGGGTTTCCTCAATTCTTGGGGCAATTAACTTCATCACAACAATTATCAATATGAAACCTGCAGCTATTTCT…
Tuna²	Thunnus thynnus 99.58%, Thunnus albacares 99.58%, Thunnus obesus 99.57%, Thunnus tonggol 99.57%	KU168646	TTCTTGGGGCAATTAACTTCATCACAACAATTATCAATATGAAACCTGCAGCTATTTCTCAGTATCAAACACCACTGTTTGTATGAGCTGTACTAATTACAGCTGTTCTTCTCCTACTTTCCCTTCCAGTCCTTGCCGCTGGTATTACAATGCTCCTTACAAACCGAAACCTAAATACAACCTTCTTCGACCCTGCAGGAGGGGGAGACCCAATCCTTTACCAACACCTATTCTGATTCTTCGGCCACCCCGAAGTCAAAGCGTTCCCCCGAATGAATAACATAAGCTTCTGACTTCTTCCCCCTTCTCTCCTACTACTC
Tuna	Thunnus albacares 100%, Thunnus atlanticus 100%, Thunnus maccoyii 100%, Thunnus obesus 100%	KU168647	GGTGCCCTTCTTGGGGACGACCAGATCTACAATGTAATCGTTACGGCCCATGCCTTCGTAATGATTTTCTTTATAGTAATACCAATTATGATTGGAGGATTTGGAAACTGACTTATTCCTCTAATGATCGGAGCCCCCGACATGGCATTCCCACGAATGAACAACATGAGCTTCTGACTCCTTCCCCCCTCTTTCCTTCTGCTCCTAGCTTCTTCAGGAGTTGAGGCTGGAGCCGGAACCGGTTGAACAGTCTACCCTCCCCTTGCCGGCAACCTGGCCCACGCAGGGGCATCAGTTGACCTAACTATTTTCTCACTTCACTTAGCAGGGGTTTCCTCAATTCTTGGGGCAATTAACTTCATCACAACAATTATCAATATGAAACCTGCAGCTATTTCT…
Tuna	Thunnus albacares 100%	KU168648	GCCCTTCTTGGGGACGACCAGATCTACAATGTAATCGTTACGGCCCATGCCTTCGTAATGATTTTCTTTATAGTAATACCAATTATGATTGGAGGATTTGGAAACTGACTTATTCCTCTAATGATCGGAGCCCCCGACATGGCATTCCCACGAATGAACAACATGAGCTTCTGACTCCTTCCCCCCTCTTTCCTTCTGCTCCTAGCTTCTTCAGGAGTTGAGGCTGGAGCCGGAACCGGTTGAACAGTCTACCCTCCCCTTGCCGGCAATCTGGCCCACGCAGGGGCATCAGTTGACCTAACTATTTTCTCACTTCACTTAGCAGGGGTTTCCTCAATTCTTGGGGCAATTAACTTCATCACAACAATTATCAATATGAAACCTGCAGCTATTTCTCAG…
Tuna	Thunnus albacares 100%, Thunnus atlanticus 100%, Thunnus maccoyii 100%, Thunnus obesus 100%	KU168649	GGGGACGACCAGATCTACAATGTAATCGTTACGGCCCATGCCTTCGTAATGATTTTCTTTATAGTAATACCAATTATGATTGGAGGATTTGGAAACTGACTTATTCCTCTAATGATCGGAGCCCCCGACATGGCATTCCCACGAATGAACAACATGAGCTTCTGACTCCTTCCCCCCTCTTTCCTTCTGCTCCTAGCTTCTTCAGGAGTTGAGGCTGGAGCCGGAACCGGTTGAACAGTCTACCCTCCCCTTGCCGGCAACCTGGCCCACGCAGGGGCATCAGTTGACCTAACTATTTTCTCACTTCACTTAGCAGGGGTTTCCTCAATTCTTGGGGCAATTAACTTCATCACAACAATTATCAATATGAAACCTGCAGCTATTTCTCAGTATCAAACA…
Tuna*	Seriola quinqueradiata 99.85%, Seriola lalandi 94.97%	KU168650	CGGTGCCTGAGCCGGCATGGTCGGTACAGCTTTAAGTTTACTCATCCGAGCAGAACTTAGTCAACCCGGTGCTCTTCTGGGAGACGATCAAATTTATAACGTAATCGTTACAGCGCACGCGTTTGTAATAATTTTCTTTATAGTAATGCCAATTATGATTGGAGGGTTTGGGAACTGACTCATCCCCTTAATGATCGGGGCTCCCGATATAGCATTCCCCCGAATAAACAACATGAGCTTCTGACTCCTTCCCCCTTCATTCCTCCTACTTCTGGCCTCTTCAGGTGTTGAAGCCGGAGCTGGGACGGGTTGGACAGTCTACCCGCCCCTAGCCGGCAACCTTGCTCACGCGGGAGCATCCGTAGACTTAACAATTTTCTCCCTTCATTTAGCTGGGAT…
Tuna	Thunnus obesus 100%, Thunnus albacares 99.69%	KU168651	CagagtcggaTGCaTGgAgCTGGATAGTTGGCACGGCCTTAAGCTTGCTCATCCGAGCTGAACTAAGCCAACCAGGTGCCCTTCTTGGGGACGACCAGATCTACAATGTAATCGTTACGGCCCATGCCTTCGTAATGATTTTCTTTATAGTAATACCAATTATGATTGGAGGATTTGGAAACTGACTTATTCCTCTAATGATCGGAGCCCCCGACATGGCATTCCCACGAATGAACAACATGAGCTTCTGACTCCTTCCCCCCTCTTTCCTTCTGCTTCTAGCTTCTTCAGGAGTTGAGGCTGGAGCCGGAACCGGTTGAACAGTCTACCCTCCCCTTGCCGGCAACCTGGCCCACGCAGGGGCATCAGTTGACCTAACTATTTTCTCACTGCACTTAG…
Tuna*	Thunnus albacares 100%, Thunnus atlanticus 100%, Thunnus obesus 100%, Thunnus maccoyii 99.85%	KU168652	ttgNATTCGGTGCtGAGCTGGATAGTTGGCACGGCCTTAAGCTTGCTCATCCGAGCTGAACTAAGCCAACCAGGTGCCCTTCTTGGGGACGACCAGATCTACAATGTAATCGTTACGGCCCATGCCTTCGTAATGATTTTCTTTATAGTAATACCAATTATGATTGGAGGATTTGGAAACTGACTTATTCCTCTAATGATCGGAGCCCCCGACATGGCATTCCCACGAATGAACAACATGAGCTTCTGACTCCTTCCCCCCTCTTTCCTTCTGCTCCTAGCTTCTTCAGGAGTTGAGGCTGGAGCCGGAACCGGTTGAACAGTCTACCCTCCCCTTGCCGGCAACCTGGCCCACGCAGGGGCATCAGTTGACCTAACTATTTTCTCACTTCACTTAGCA…
Tuna (Spicy)	Thunnus albacares 100%, Thunnus atlanticus 100%, Thunnus obesus 100%, Thunnus maccoyii 99.85%	KU168653	CTNcANCGGTGCTGAGCTGGATAGTTGGCACGGCCTTAAGCTTGCTCATCCGAGCTGAACTAAGCCAACCAGGTGCCCTTCTTGGGGACGACCAGATCTACAATGTAATCGTTACGGCCCATGCCTTCGTAATGATTTTCTTTATAGTAATACCAATTATGATTGGAGGATTTGGAAACTGACTTATTCCTCTAATGATCGGAGCCCCCGACATGGCATTCCCACGAATGAACAACATGAGCTTCTGACTCCTTCCCCCCTCTTTCCTTCTGCTCCTAGCTTCTTCAGGAGTTGAGGCTGGAGCCGGAACCGGTTGAACAGTCTACCCTCCCCTTGCCGGCAACCTGGCCCACGCAGGGGCATCAGTTGACCTAACTATTTTCTCACTTCACTTAGCAG…
Tuna	Thunnus albacares 100%, Thunnus atlanticus 100%, Thunnus obesus 100%, Thunnus maccoyii 99.85%	KU168654	GcTNCGGTGCATGAGCTGGATAGTTGGCACGGCCTTAAGCTTGCTCATCCGAGCTGAACTAAGCCAACCAGGTGCCCTTCTTGGGGACGACCAGATCTACAATGTAATCGTTACGGCCCATGCCTTCGTAATGATTTTCTTTATAGTAATACCAATTATGATTGGAGGATTTGGAAACTGACTTATTCCTCTAATGATCGGAGCCCCCGACATGGCATTCCCACGAATGAACAACATGAGCTTCTGACTCCTTCCCCCCTCTTTCCTTCTGCTCCTAGCTTCTTCAGGAGTTGAGGCTGGAGCCGGAACCGGTTGAACAGTCTACCCTCCCCTTGCCGGCAACCTGGCCCACGCAGGGGCATCAGTTGACCTAACTATTTTCTCACTTCACTTAGCAGG…
Tuna	Thunnus thynnus 100%, Thunnus orientalis 99.69%, Thunnus atlanticus 99.69%, Thunnus maccoyii 99.54%, Thunnus albacares 99.53%	KU168655	TCGGTGCATGAGCTGGATAGTTGGCACGGCCTTAAGCTTGCTCATCCGAGCTGAACTAAGCCAACCAGGTGCCCTTCTTGGGGACGACCAGATCTACAATGTAATCGTTACGGCCCATGCCTTCGTAATGATTTTCTTTATAGTAATACCAATTATGATTGGAGGATTTGGAAACTGACTTATTCCTCTAATGATCGGAGCCCCCGACATGGCATTCCCACGAATGAACAACATGAGCTTCTGACTCCTTCCCCCTTCTTTCCTTCTGCTCCTAGCTTCTTCAGGAGTTGAGGCTGGAGCCGGAACCGGTTGAACAGTCTACCCTCCCCTTGCCGGCAACCTAGCCCACGCAGGGGCATCAGTTGACCTAACTATTTTCTCACTTCACTTAGCGGGGGT…
Tuna	Thunnus obesus 98.9%, Thunnus albacares 98.9%, Thunnus atlanticus 98.75%	KU168656	CTGgAtAgTTGGCACAGCCTTAAGCTTGCTCATCCGAGCTGAACTAATCcAatCNgGTGCCCTTCTTGGGGACGACCAGATCTACAATGTAATCGTTACGGCCCATGCCTTCNTAATGATTTTCTTTATAATAATACCAATTATGATTGGAGGATTTGGAAACTGACTTATTCCTCTNATGATCGGAGCCCCCGACATGGCATTCCCACGAATGAACAACATGAGCTTCTGACTCCTTCCCCCCTCTTTCCTTCTGCTCCTANCTTCTTCAGGAGTTGAGGCTGGAGCCGGAACCGGTTGAACAGTCTACCCTCCCCTTGCCGGCAACCTGGCCCACGCATGGGCATCANTTGACCTAACTATTTTCTCACTTCACTTAGCAGGGGTTTCCTCANTTCT…
Tuna	Thunnus albacares 99.18%, Thunnus atlanticus 98.98%, Thunnus obesus 98.98%, Thunnus thynnus 98.77%	KU168657	GGTGCttGgAGCTGGATAGTTGGCACGGCCttaagcTTGCTCATCCGAGCTGAACTAAGCNAaagggcgcCCTTCTTGGGGACGACCAGATCTACAATGTAATCgTtAcTGCCCATGCCTTCGTAATGATTTTCTTTATAGTAATACCAATTATGATTGGAGGATTTGGAAACTGACTTATTCCTCTAATGATCGGAGCCCCCGACATGGCATTCCCACNAATGAACAACATGAGCTTCTGACTCCTTCCCCCCTCTTTCCTTCTGCTCCTAGCTTCTTCAGGAGTTGAGGNTGGAGCCGGAACCGGTTGAACAGTCTACCCTCCCCTTGCCGGCAACCTGGCCCACGCAGGGGCATCAGTTGACCTAACTATTTTCTCACTTCACTTAGCAGGGGTTT…
Tuna	Thunnus thynnus 100%, Thunnus orientalis 99.84%, Thunnus maccoyii 99.84%, Thunnus alalunga 99.69%, Thunnus obesus 99.68%, Thunnus atlanticus 99.19%, Thunnus albacares 99%	KU168658	TGCATGAgCTGGATAGTTGGCACGGCCTTAAGCTTGCTCATCCGAGCTGAACTAAGCCAACCAGGTGCCCTTCTTGGGGACGACCAGATCTACAATGTAATCGTTACGGCCCATGCCTTCGTAATGATTTTCTTTATAGTAATACCAATTATGATTGGAGGATTTGGAAACTGACTTATTCCTCTAATGATCGGAGCCCCCGACATGGCATTCCCACGAATGAACAACATGAGCTTCTGACTCCTTCCTCCCTCTTTCCTTCTGCTCCTAGCTTCTTCAGGAGTTGAGGCTGGAGCCGGAACCGGTTGAACAGTCTACCCTCCCCTTGCCGGCAACCTAGCCCACGCAGGGGCATCAGTTGACCTAACTATTTTCTCACTTCACTTAGCAGGGGTTTCC…
Tuna	Thunnus albacares 100%, Thunnus maccoyii 99.84%, Thunnus obesus 99.82%, Thunnus atlanticus 99.8%	KU168659	TctGtTtCGGTGCATGAGCTGGATAGTTGGCACGGCCTTAAGCTTGCTCATCCGAGCTGAACTAAGCCAACCAGGTGCCCTTCTTGGGGACGACCAGATCTACAATGTAATCGTTACGGCCCATGCCTTCGTAATGATTTTCTTTATAGTAATACCAATTATGATTGGAGGATTTGGAAACTGACTTATTCCTCTAATGATCGGAGCCCCCGACATGGCATTCCCACGAATGAACAACATGAGCTTCTGACTCCTTCCCCCCTCTTTCCTTCTGCTCCTAGCTTCTTCAGGAGTTGAGGCTGGAGCCGGAACCGGTTGAACAGTCTACCCACCCCTTGCCGGCAACCTGGCCCACGCAGGGGCATCAGTTGACCTAACTATTTTCTCACTTCACTTAGC…
Tuna*	Thunnus albacares 100%, Thunnus atlanticus 100%, Thunnus maccoyii 100%, Thunnus obesus 100%, Thunnus tonggol 99.84%	KU168660	CggctGCATGCAGCTGGATAGTTGGCACGGCCTTAAGCTTGCTCATCCGAGCTGAACTAAGCCAACCAGGTGCCCTTCTTGGGGACGACCAGATCTACAATGTAATCGTTACGGCCCATGCCTTCGTAATGATTTTCTTTATAGTAATACCAATTATGATTGGAGGATTTGGAAACTGACTTATTCCTCTAATGATCGGAGCCCCCGACATGGCATTCCCACGAATGAACAACATGAGCTTCTGACTCCTTCCCCCCTCTTTCCTTCTGCTCCTAGCTTCTTCAGGAGTTGAGGCTGGAGCCGGAACCGGTTGAACAGTCTACCCTCCCCTTGCCGGCAACCTGGCCCACGCAGGGGCATCAGTTGACCTAACTATTTTCTCACTTCACTTAGCAGGGG…
Tuna	Thunnus albacares 100%, Thunnus atlanticus 100%, Thunnus maccoyii 100%, Thunnus obesus 100%	KU168661	GCTCATCCGAGCTGAACTAAGCCAACCAGGTGCCCTTCTTGGGGACGACCAGATCTACAATGTAATCGTTACGGCCCATGCCTTCGTAATGATTTTCTTTATAGTAATACCAATTATGATTGGAGGATTTGGAAACTGACTTATTCCTCTAATGATCGGAGCCCCCGACATGGCATTCCCACGAATGAACAACATGAGCTTCTGACTCCTTCCCCCCTCTTTCCTTCTGCTCCTAGCTTCTTCAGGAGTTGAGGCTGGAGCCGGAACCGGTTGAACAGTCTACCCTCCCCTTGCCGGCAACCTGGCCCACGCAGGGGCATCAGTTGACCTAACTATTTTCTCACTTCACTTAGCAGGGGTTTCCTCAATTCTTGGGGCAATTAACTTCATCACAACAAT…
Tuna	Thunnus albacares 100%, Thunnus atlanticus 100%, Thunnus obesus 100%, Thunnus maccoyii 99.85%,	KU168662	tATTCGtGTGCATGAGCTGGATAGTTGGCACGGCCTTAAGCTTGCTCATCCGAGCTGAACTAAGCCaACCAGGTGCCCTTCTTGGGGACGACCAGATCTACAATGTAATCGTTACGGCCCATGCCTTCGTAATGATTTTCTTTATAGTAATACCAATTATGATTGGAGGATTTGGAAACTGACTTATTCCTCTAATGATCGGAGCCCCCGACATGGCATTCCCACGAATGAACAACATGAGCTTCTGACTCCTTCCCCCCTCTTTCCTTCTGCTCCTAGCTTCTTCAGGAGTTGAGGCTGGAGCCGGAACCGGTTGAACAGTCTACCCTCCCCTTGCCGGCAACCTGGCCCACGCAGGGGCATCAGTTGACCTAACTATTTTCTCACTTCACTTAGCAG…
Tuna	Thunnus albacares 100%, Thunnus atlanticus 99.84%, Thunnus maccoyii 99.84%, Thunnus obesus 99.82%	KU168663	CGGtGCATGAGCTGgAtAGTTGGCACGGCCTTAAGCTTGCTCATCCGAGCTGAACTAAGCCAACCAGGTGCCCTTCTTGGGGACGACCAGATCTACAATGTAATCGTTACGGCCCATGCCTTCGTAATGATTTTCTTTATAGTAATACCAATTATGATTGGAGGATTTGGAAACTGACTTATTCCTCTAATGATCGGAGCCCCCGACATGGCATTCCCACGAATGAACAACATGAGCTTCTGACTCCTTCCCCCCTCTTTCCTTCTGCTCCTAGCTTCTTCAGGAGTTGAGGCTGGAGCCGGAACCGGTTGAACAGTCTACCCACCCCTTGCCGGCAACCTGGCCCACGCAGGGGCATCAGTTGACCTAACTATTTTCTCACTTCACTTAGCAGGGGTT…
Eel	Anguilla anguilla 100%	KU168664	TGAGCCTTCTAATCCGTGCCGAATTAAGTCAACCAGGCGCCCTTCTTGGAGATGACCAAATTTACAATGTCATCGTCACAGCGCATGCCTTTGTAATGATTTTCTTTATAGTAATGCCAGTAATAATTGGAGGATTTGGCAACTGACTTGTGCCATTAATAATCGGCGCCCCAGACATAGCATTCCCCCGAATAAATAATATAAGCTTCTGACTTTTACCCCCATCATTTCTTCTACTACTAGCCTCCTCTGGAGTAGAGGCCGGAGCTGGTACAGGCTGAACTGTATATCCACCCCTGGCTGGAAACTTAGCCCACGCCGGGGCATCTGTTGACCTGACAATTTTCTCACTCCACCTTGCAGGTATTTCATCAATTCTAGGGGCCATTAACTTTATTA…
Eel	Anguilla anguilla 100%	KU168665	GCCGAATTAAGTCAACCAGGCGCCCTTCTTGGAGATGACCAAATTTACAATGTCATCGTCACAGCGCATGCCTTTGTAATGATTTTCTTTATAGTAATGCCAGTAATAATTGGAGGATTTGGCAACTGACTTGTGCCATTAATAATCGGCGCCCCAGACATAGCATTCCCCCGAATAAATAATATAAGCTTCTGACTTTTACCCCCATCATTTCTTCTACTACTAGCCTCCTCTGGAGTAGAGGCCGGAGCTGGTACAGGCTGAACTGTATATCCACCCCTGGCTGGAAACTTAGCCCACGCCGGGGCATCTGTTGACCTGACAATTTTCTCACTCCACCTTGCAGGTATTTCATCAATTCTAGGGGCCATTAACTTTATTACTACAATTATTAACATG…
Eel	Anguilla marmorata 99.84%	KU168666	ATGGTGGGAACCGCACTAAGCCTTCTAATCCGTGCCGAATTAAGTCAACCAGGCGCCCTTCTTGGAGATGACCAAATTTACAATGTCATCGTCACAGCGCATGCCTTTGTAATGATTTTCTTTATAGTAATACCAGTAATAATTGGAGGATTTGGCAACTGACTTGTGCCATTAATGATCGGCGCTCCAGACATAGCATTTCCCCGAATAAACAATATAAGCTTCTGACTCTTACCACCATCATTTCTCCTTCTACTAGCCTCCTCAGGAGTAGAAGCTGGGGCTGGTACAGGTTGAACTGTATATCCGCCTCTAGCTGGAAACTTAGCCCACGCCGGAGCATCTGTTGACCTGACAATTTTCTCGCTTCACCTTGCAGGAATTTCATCAATCCTAGGG…
Eel	Anguilla japonica 99.36%	KU168667	TCATTCCTTCTTCTGCTGGCCTCCTCAGGGGTAGAAGCTGGGGCCGGTACAGGTTGAACCGTATATCCTCCTCTAGCTGGAAACTTAGCCCATGCCGGAGCATCTGTTGACCTGACAATCTTTTCACTTCACCTTGCAGGGATTTCATCAATCCTAGGAGCCATTAATTTTATTACTACAATTATTAATATGAAGCCGCCTGCCATTACACAGTACCAAACCCCACTGTTTGTATGAGCTGTTTTAGTTACCGCTGTTCTACTACTTCTATCCCTGCCAGTCCTAGCTGCAGGTATTACAATACTTCTAACTG
Eel	Anguilla anguilla 99.84%	KU168668	ctcGtATTtGGTGCCTGAGCCGGATAGTCGGCACTGCACTGAGCCTTCTAATCCGTGCCGAATTAAGTCAACCAGGCGCCCTTCTTGGAGATGACCAAATTTACAATGTCATCGTCACAGCGCATGCCTTTGTAATGATTTTCTTTATAGTAATGCCAGTAATAATTGGAGGATTTGGCAACTGACTTGTGCCATTAATAATCGGCGCCCCAGACATAGCATTCCCCCGAATAAATAATATAAGCTTCTGACTTTTACCCCCATCATTTCTTCTACTACTAGCCTCCTCTGGAGTAGAGGCCGGAGCTGGTACAGGCTGAACTGTATATCCTCCCCTGGCTGGAAACTTAGCCCACGCCGGGGCATCTGTTGACCTGACAATTTTCTCACTCCACCTTG…
Eel	Anguilla rostrata 99.84%	KU168669	GctGAGCCGGATAGTCGGTACTGCACTGAGCCTTCTAATCCGTGCCGAATTAAGTCAaCNAggcgccCTTCTTGGAGATGACCAAATTTACAATGTCATCGTCACAGCGCATGCCTTTGTAATGATTTTCTTTATAGTAATGCCAGTAATAATCGGAGGATTTGGCAACTGACTTGTGCCATTAATAATCGGCGCTCCAGACATAGCGTTCCCCCGAATAAATAATATAAGCTTCTGACTTTTACCCCCATCATTTCTTCTACTACTAGCCTCCTCTGGAGTAGAGGCTGGGGCTGGTACAGGCTGAACTGTATATCCACCCCTGGCTGGAAACTTAGCCCACGCCGGAGCATCTGTTGACCTGACAATTTTCTCACTTCACCTTGCAGGTATCTCATC…
Eel	Anguilla japonica 99.63%	KU168670	GCATGCCTTTGTAATGATTTTCTTTATAGTAATACCAGTAATAATTGGAGGATTTGGCAACTGGCTCGTGCCGTTAATGATCGGCGCCCCAGACATAGCATTTCCCCGAATAAACAACATAAGCTTCTGACTTTTACCACCATCATTCCTTCTTCTGCTGGCCTCCTCAGGGGTAGAAGCTGGGGCCGGTACAGGTTGAACCGTATATCCTCCTCTAGCTGGAAACTTAGCCCATGCCGGAGCATCTGTTGACCTGACAATCTTTTCACTTCACCTTGCAGGGATTTCATCAATCCTAGGGGCCATTAATTTTATTACTACAATTATTAATATGAAGCCGCCTGCCATTACACAGTACCAAACCCCACTGTTTGTATGAGCTGTTTTAGTTACCGCTGT…
Eel (Freshwater)²	Anguilla japonica 99.79%	KU168671	GTCATCGTCACAGCGCATGCCTTTGTAATGATTTTCTTTATAGTAATACCAGTAATAATTGGAGGATTTGGCAACTGGCTCGTGCCGTTAATGATCGGCGCCCCAGACATAGCATTTCCCCGAATAAACAACATAAGCTTCTGACTTTTACCACCATCATTCCTTCTTCTGCTGGCCTCCTCAGGGGTAGAAGCTGGGGCCGGTACAGGTTGAACCGTATATCCTCCTCTAGCTGGAAACTTAGCCCATGCCGGAGCATCTGTTGACCTGACAATCTTTTCACTTCACCTTGCAGGGATTTCATCAATCCTAGGGGCCATTAATTTTATTACTACAATTATTAATATGAAGCCGCCTGCCATTACACAGTACCAAACCCCACTGTTTGTATGAGCTGTT…
Eel (grilled)	Anguilla anguilla 100%	KU168672	CCCTTCTTGGAGATGACCAAATTTACAATGTCATCGTCACAGCGCATGCCTTTGTAATGATTTTCTTTATAGTAATGCCAGTAATAATTGGAGGATTTGGCAACTGACTTGTGCCATTAATAATCGGCGCCCCAGACATAGCATTCCCCCGAATAAATAATATAAGCTTCTGACTTTTACCCCCATCATTTCTTCTACTACTAGCCTCCTCTGGAGTAGAGGCCGGAGCTGGTACAGGCTGAACTGTATATCCACCCCTGGCTGGAAACTTAGCCCACGCCGGGGCATCTGTTGACCTGACAATTTTCTCACTCCACCTTGCAGGTATTTCATCAATTCTAGGGGCCATTAACTTTATTACTACAATTATTAACATGAAACCGCCTGCAATTACACAGT…
Eel²	Anguilla japonica 99.49%	KU168673	TATGAAGCCGCCTGCCATTACACAGTACCAAACCCCACTGTTTGTATGAGCTGTTTTAGTTACCGCTGTTCTACTACTTCTATCCCTGCCAGTCCTAGCTGCAGGTATTACAATACTTCTAACTGACCGAAATTTAAATACAACCTTCTTTGACCCTGCAGGGGGTGGAGACCCAATCCTCTACCAACACCTATTCTGCTGTCTTCTTCGGCAGTTGAAGCTGGAGCCGGAACTGGCTGAACAGTCTACCCCCCACTA
Eel	Anguilla anguilla 99.84%	KU168674	TcgtgtgNaTGNgtccGGATAGTCGGCACTGCACTGAGCCTTCTAATCCGTGCCGAATTAAGTCAACCAGGCGCCCTTCTTGGAGATGACCAAATTTACAATGTCATCGTCACAGCGCATGCCTTTGTAATGATTTTCTTTATAGTAATGCCAGTAATAATTGGAGGATTTGGCAACTGACTTGTACCATTAATAATCGGCGCCCCAGACATAGCATTCCCCCGAATAAATAATATAAGCTTCTGACTTTTACCCCCATCATTTCTTCTACTACTAGCCTCCTCTGGAGTAGAGGCCGGAGCTGGTACAGGCTGAACTGTATATCCACCCCTGGCTGGAAACTTAGCCCACGCCGGGGCATCTGTTGACCTGACAATTTTCTCACTCCACCTTGCAGGT…
Eel (Freshwater)	Anguilla anguilla 100%	KU168675	agagaCGGATAGTCGGCACTGCACTGagCCTTCTAATCCGTGCCGAATTAAGTCAACCaGGCGCCCTTCTTGGAGATGACCAAATTTACAATGTCATCGTCACAGCGCATGCCTTTGTAATGATTTTCTTTATAGTAATGCCAGTAATAATTGGAGGATTTGGCAACTGACTTGTGCCATTAATAATCGGCGCCCCAGACATAGCATTCCCCCGAATAAATAATATAAGCTTCTGACTTTTACCCCCATCATTTCTTCTACTACTAGCCTCCTCTGGAGTAGAGGCCGGAGCTGGTACAGGCTGAACTGTATATCCACCCCTGGCTGGAAACTTAGCCCACGCCGGGGCATCTGTTGACCTGACAATTTTCTCACTCCACCTTGCAGGTATTTCATCAA…
Eel	Anguilla anguilla 99.84%	KU168676	CGTNTGGTGCTGAgCCGGATAGTCGGCACTGCACTGAGCCTTCTAATCCGTGCCGAATTAAGTCAACCAGGCGCCCTTCTTGGAGATGACCAAATTTACAATGTCATCGTCACAGCGCATGCCTTTGTAATGATTTTCTTTATAGTAATGCCAGTAATAATTGGAGGATTTGGCAACTGACTTGTGCCATTAATAATCGGCGCCCCAGACATAGCATTCCCCCGAATAAATAATATAAGCTTCTGACTTTTACCCCCATCATTTCTTCTACTACTAGCCTCCTCTGGAGTAGAGGCCGGAGCTGGTACAGGCTGAACTGTATATCCACCCCTGGCTGGAAACTTGGCCCACGCCGGGGCATCTGTTGACCTGACAATTTTCTCACTCCACCTTGCAGGT…
Eel	Anguilla japonica 99.54%, Anguilla marmorata 94.74%	KU168677	GNAtTTGGTGCCTGAGCCGGATAGTTGGAACCGCACTAAGCCTTCTAATCCGTGCCGAATTAAGTCAACCAGGCGCCCTTCTTGGAGACGACCAAATTTACAATGTCATCGTCACAGCGCATGCCTTTGTAATGATTTTCTTTATAGTAATACCAGTAATAATTGGAGGATTTGGCAACTGGCTCGTGCCGTTAATGATCGGCGCCCCAGACATAGCATTTCCCCGAATAAACAACATAAGCTTCTGACTTTTACCACCATCATTCCTTCTTCTGCTGGCCTCCTCAGGGGTAGAAGCTGGGGCCGGTACAGGTTGAACCGTATATCCTCCTCTAGCTGGAAACTTAGCCCATGCCGGAGCATCTGTTGACCTGACAATCTTTTCACTTCACCTTGCAG…
Eel	Anguilla rostrata 99.84%	KU168678	CGttTNGGTGCTGAgCCGGATAGTCGGTACTGCACTGAGCCTTCTAATCCGTGCCGAATTAAGTCAACCAGGCGCCCTTCTTGGAGATGACCAAATTTACAATGTCATCGTCACAGCGCATGCCTTTGTAATGATTTTCTTTATAGTAATGCCAGTAATAATCGGAGGATTTGGCAACTGACTTGTGCCATTAATAATCGGCGCTCCAGACATAGCGTTCCCCCGAATAAATAATATAAGCTTCTGACTTTTACCCCCATCATTTCTTCTACTACTAGCCTCCTCTGGAGTAGAGGCTGGGGCTGGTACAGGCTGAACTGTATATCCACCCCTGGCTGGAAACTTAGCCCACGCCGGAGCATCTGTTGACCTGACAATTTTCTCACTTCACCTTGCAGG…
Eel	Anguilla anguilla 100%	KU168679	GTGCCTGAGcCGGATAGTCGGCACTGCACTGAGCCTTCTAATCCGTGCCGAATTAAGTCAACCaGGCGCCCTTCTTGGAGATGACCAAATTTACAATGTCATCGTCACAGCGCATGCCTTTGTAATGATTTTCTTTATAGTAATGCCAGTAATAATTGGAGGATTTGGCAACTGACTTGTGCCATTAATAATCGGCGCCCCAGACATAGCATTCCCCCGAATAAATAATATAAGCTTCTGACTTTTACCCCCATCATTTCTTCTACTACTAGCCTCCTCTGGAGTAGAGGCCGGAGCTGGTACAGGCTGAACTGTATATCCACCCCTGGCTGGAAACTTAGCCCACGCTGGGGCATCTGTTGACCTGACAATTTTCTCACTCCACCTTGCAGGTATTTC…
Eel	Anguilla anguilla 100%	KU168680	CTCGtAtTNGGTGCCTGAgCCGGATAGTCGGCACTGCACTGAGCCTTCTAATCCGTGCCGAATTAAGTCAACCAGGCGCCCTTCTTGGAGATGACCAAATTTACAATGTCATCGTCACAGCGCATGCCTTTGTAATGATTTTCTTTATAGTAATGCCAGTAATAATTGGAGGATTTGGCAACTGACTTGTGCCATTAATAATCGGCGCCCCAGACATAGCATTCCCCCGAATAAATAATATAAGCTTCTGACTTTTACCCCCATCATTTCTTCTACTACTAGCCTCCTCTGGAGTAGAGGCCGGAGCTGGTACAGGCTGAACTGTATATCCACCCCTGGCTGGAAACTTAGCCCACGCCGGGGCATCTGTTGACCTGACAATTTTCTCACTCCACCTTG…
Eel*	Anguilla anguilla 90%	KU168681	TaTTTagCACTGTATTGAgCCTTCTCATCCGTGCCGAATTAAGTCAACCAGGCGCCCTTCTTGGAGATGACCAaATTTACATGtTTCgacAaAGCGCATGCCTTTaTAATGATTTTCTTTATAGtAATGCCAGtAATAATTGGAgGATTNGGCAACTGACTTGTGCCAtgATTAgtCGCcGCCCCCtACAtTAATTCCCCCaAATAAATAATATgACttCTcACgTTACCCCCATCATTTCaTCAACTACTAtCCTCCTCTggANNAtAGGCCGGAGCTGGtACANGCTGATCTGTATATCCACCCCTGGCTGGCaCTTACCCCACGCCGGGGCATCTGTTGACCTGACtATTTTCTCACTCCACCTTGCNGGtATTTCNTCTATTCTAGGGGCCATTA…
Eel (smoked)	Anguilla anguilla 98.86%	KU168682	TCCGAGCCGAATTAAGTCAACCAGGCGCCCTTCTTGGAGATGACCAAATTTACAATGTCATCGTCACAGCGCATGCCTTTGTAATGATTTTCTTTATAGTAATGCCAATNAATTGGAGGATTTGGCAACTGACTTGTGCCATTAATGATCGGCGCCCCAGACATAGCATTCCCCCGAATAAATAATATAAGCTTCTGACTTTTACCCCCATCATTTCTTCTACTACTAGCCTCCTCTGGAGTAGAGGCCGGAGCTGGTACAGGCTGAACTGTATATCNNCCCCTGGCTGGAAACTTNNCCCACGCCGGGGCATCTGTTGACCTGACAATTTTCTCACTCCACCTTGCAGGTATTTCATCAATTCTAGGGGCCATTAACTTTATTACTACAATCATTAAC…
Eel	Anguilla anguilla 99.84%	KU168683	GTGCTGAGCCGGATAGTCGGCACTGCACTGAGCCTTCTAATCCGTGCCGAATTAAGTCAACCAaGCGCCCTTCTTGGAGATGACCAAATTTACAATGTCATCGTCACAGCGCATGCCTTTGTAATGATTTTCTTTATAGTAATGCCAGTAATAATTGGAGGATTTGGCAACTGACTTGTGCCATTAATAATCGGCGCCCCAGACATAGCATTCCCCCGAATAAATAATATAAGCTTCTGACTTTTACCCCCATCATTTCTTCTACTACTAGCCTCCTCTGGAGTAGAGGCCGGAGCTGGTACAGGCTGAACTGTATATCCACCCCTGGCTGGAAACTTAGCCCACGCCGGGGCATCTGTTGACCTGACAATTTTCTCACTCCACCTTGCAGGTATTTCA…
Eel	Anguilla anguilla 99.37%	KU168684	TCGNATtGGTGCTGAGCCGGATAGTCGGCACTGCACTGAGCCTTCTAATCCGTGCCGAATTAAGTCAACCAGGCGCCCTTCTTGGAGATGACCAAATTTACAATGTCATCGTCACAGCGCATGCCTTTGTAATGATTTTCTTTATAGTAATGCCAGTAATAATTGGAGGATTTGGCAACTGACTTGTGCCATTAATAATCGGCGCCCCAGACATAGCATTTCCCCGAATAAATAATATAAGCTTCTGACTTTTACCCCCATCATTTCTTCTACTACTAGCCTCCTCTGGAGTAGAGGCCGGAGCTGGTACAGGTTGAACTGTATATCCACCCCTGGCTGGAAACTTAGCCCACGCCGGGGCATCTGTTGACCTGACAATTTTCTCACTCCACCTTGCAG…
Seabass*	Dicentrarchus labrax 99%	KU168685	AGCtACgANGCTGTCATTATTACTAAGAGGAGAAGGATTACCCCGATGTTTCATGTTTCTTTATACAGGTATGAGCCGTAGTACAGGCCTCGGCCAATGTGAAGATAAATACAAATAAAGAAGAAAGATGCACCATTGGCGTGAAGATTACGAATAAGTCAGCCATAGTTAACATCTCGACAAATGTGTGCGATGGAGGAGAAGGCTGTTGCGATATCTGAAGTATAATGTATAGCTAAAAATAGACCTGTAAGAATTTGGGAAATCAAGCATAGGCCTAAGAGCGAACCGAAATTTCATCAAACTGAAATATTTGAAGGGGCCGGCAGGTCAATAAGTGCATGATTTGCGATTTTTAATAGGGGGTGTGTTTTACGGAGGGCGGCCATTAATGCTCCC…
Seabass*	Dicentrarchus labrax 100%	KU168686	AgttcTACGANgGCTGTCATTATTACTAAGAGGAGAAGGATTACCCCGATGTTTCATGTTTCTTTATACAGGTATGAGCCGTAGTACAGGCCTCGGCCAATGTGAAGATAAATACAAATAAAGAAGAAAGATGCACCATTGGCGTGAAGATTACGAATAAGTCAGCCATAGTTAACATCTCGACAAATGTGTGCGATGGAGGAGAAGGCTGTTGCGATATCTGAAGTATAATGTATAGCTAAAAATAGACCTGTAAGAATTTGGGAAATCAAGCATAGGCCTAAGAGCGAACCGAAATTTCATCAAACTGAAATATTTGAAGGGGCCGGCAGGTCAACAAGTGCATGATTTGCGATTTTTAATAGGGGGTGTGTTTTACGGAGGGCGGCCATTAATGCT…
Seabass²	Dicentrarchus labrax 100%	KU168687	CTATTAATTTCATTACAACTATTATTAATATAAAACCCCCTGCCATTTCCCAGTACCAAACTCCTTTGTTTGTCTGAGCTGTTCTCATTACAGCCGTCCTTCTACTTCTCTCCCTCCCTGTTCTTGCAGCTGGAATTACTATATTACTTACAGACCGTAATTTAAATACCNCTTTTTTCGACCCCGCAGGGGGTGGAGACCCCATCCT
Seabass*	Dicentrarchus labrax 100%	KU168688	GCACTTATTGACCTGCCGGCCCCTTCAAATATTTCAGTTTGATGAAATTTCGGTTCGCTCTTAGGCCTATGCTTGATTTCCCAAATTCTTACAGGTCTATTTTTAGCTATACATTATACTTCAGATATCGCAACAGCCTTCTCCTCCATCGCACACATTTGTCGAGATGTTAACTATGGCTGACTTATTCGTAATCTTCACGCCAATGGTGCATCTTTCTTCTTTATTTGTATTTATCTTCACATTGGCCGAGGCCTGTACTACGGCTCATACCTGTATAAAGAAACATGAAACATCGGGGTAATCCTTCTCCTCTTAGTAATAATGACAGCCTTCGTAGGCTATGTGTTGCCCTGAGGACAAAT
Seabass	Lateolabrax japonicus 100%, Lateolabrax maculatus 99.63%	KU168689	GGTGCCTTGTTAGGAAGCGACCAGATCTACAACGTCATCGTTACAGCACACGCGTTCGTGATAATCTTCTTTATAGTAATACCAATTATGATTGGGGGGTTTGGAAACTGATTAATTCCCCTAATGATCGGCGCCCCAGATATAGCGTTCCCTCGGATGAACAACATAAGCTTTTGACTCCTTCCCCCCTCTTTCCTTCTCCTCCTCTCCTCTTCTGCAGTAGAAGCCGGGGCCGGAACTGGGTGAACCGTTTACCCTCCCTTAGCCAGCAACTTAGCTCACGCAGGGGCCTCCGTCGATCTAACAATCTTCTCCTTACACCTAGCAGGGGTTTCTTCAATCCTGGGGGCTATTAACTTTATCACAACCATCATTAACATGAAACCGCCCGCCATTTCC…
Seabass	Lateolabrax japonicus 100%, Lateolabrax maculatus 99.49%	KU168690	AATTATGATTGGGGGGTTTGGAAACTGATTAATTCCCCTAATGATCGGCGCCCCAGATATAGCGTTCCCTCGGATGAACAACATAAGCTTTTGACTCCTTCCCCCCTCTTTCCTTCTCCTCCTCTCCTCTTCTGCAGTAGAAGCCGGGGCCGGAACTGGGTGAACCGTTTACCCTCCCTTAGCCAGCAACTTAGCTCACGCAGGGGCCTCCGTCGATCTAACAATCTTCTCCTTACACCTAGCAGGGGTTTCTTCAATCCTGGGGGCTATTAACTTTATCACAACCATCATTAACATGAAACCGCCCGCCATTTCCCAGTATCAAACCCCCCTATTTGTGTGAGCCGTTTTAATCACGGCCGTCCTCCTTCTCCTCTCCCTCCCCGTTCTCGCTGCAGG
Seabass*	Dicentrarchus labrax 100%	KU168691	GTTTGATGAAATTTCGGTTCGCTCTTAGGCCTATGCTTGATTTCCCAAATTCTTACAGGTCTATTTTTAGCTATACATTATACCTCAGATATCGCAACAGCCTTCTCCTCCATCGCACACATTTGTCGAGATGTTAACTATGGCTGACTTATCCGTAATCTTCACGCCAATGGTGCATCTTTCTTCTTTATTTGTATTTATCTTCACATTGGCCGAGGCCTGTACTACGGCTCATACCTGTATAAAGAAACATGAAACATTGGGGTAATCCTTCTCCTCTTAGTAATAATGACAGCCTTCGTAGGCTATGTGCTGCCCTGAGGACAAAT
Seabass*	Dicentrarchus labrax 100%	KU168692	TATTTCAGTTTGATGAAATTTCGGTTCGCTCTTAGGCCTATGCTTGATTTCCCAAATTCTTACAGGTCTATTTTTAGCTATACATTATACTTCAGATATCGCAACAGCCTTCTCCTCCATCGCACACATTTGTCGAGATGTTAACTATGGCTGACTTATTCGTAATCTTCACGCCAATGGTGCATCTTTCTTCTTTATTTGTATTTATCTTCACATTGGCCGAGGCCTGTACTACGGCTCATACCTGTATAAAGAAACATGAAACATCGGGGTAATCCTTCTCCTCTTAGTAATAATGACAGCCTTCGTAGGCTATGTGTTGCCCTGAGGACAAATTTAGGCCTATGCTTGATTTCCCAAATTCTTACAGGTCTATTTTTAGCTATACATTATACT
Seabass*	Dicentrarchus labrax 100%	KU168693	GACCTGCCGGCCCCTTCAAATATTTCAGTTTGATGAAATTTCGGTTCGCTCTTAGGCCTATGCTTGATTTCCCAAATTCTTACAGGTCTATTTTTAGCTATACATTATACTTCAGATATCGCAACAGCCTTCTCCTCCATCGCACACATTTGTCGAGATGTTAACTATGGCTGACTTATTCGTAATCTTCACGCCAATGGTGCATCTTTCTTCTTTATTTGTATTTATCTTCACATTGGCCGAGGCCTGTACTACGGCTCATACCTGTATAAAGAAACATGAAACATCGGGGTAATCCTTCTCCTCTTAGTAATAATGACAGCCTTCGTAGGCTATGTGTTGCCCTGAGGACAAAT
Seabass*	Dicentrarchus labrax 99%	KU168694	agctaCGANGCTGTCATTATTACTAAGAGGAGAAGGATTACCCCGATGTTTCATGTTTCTTTATACAGGTATGAGCCGTAGTACAGGCCTCGGCCAATGTGAAGATAAATACAAATAAAGAAGAAAGATGCACCATTGGCGTGAAGATTACGAATAAGTCAGCCATAGTTAACATCTCGACAAATGTGTGCGATGGAGGAGAAGGCTGTTGCGATATCTGAAGTATAATGTATAGCTAAAAATAGACCTGTAAGAATTTGGGAAATCAAGCATAGGCCTAAGAGCGAACCGAAATTTCATCAAACTGAAATATTTGAAGGGGCCGGCAGGTCAATAAGTGCATGATTTGCGATTTTTAATAGGGGGTGTGTTTTACGGAGGGCGGCCATTAATGCTCCC…
Seabass*	Dicentrarchus labrax 99%	KU168695	tagNCTaCGAgGCTGTCATTATTACTAAGAGGAGAAGGATTACCCCGATGTTTCATGTTTCTTTATACAGGTATGAGCCGTAGTACAGGCCTCGGCCAATGTGAAGATAAATACAAATAAAGAAGAAAGATGCACCATTGGCGTGAAGATTACGAATAAGTCAGCCATAGTTAACATCTCGACAAATGTGTGCGATGGAGGAGAAGGCTGTTGCGATATCTGAAGTATAATGTATAGCTAAAAATAGACCTGTAAGAATTTGGGAAATCAAGCATAGGCCTAAGAGCGAACCGAAATTTCATCAAACTGAAATATTTGAAGGGGCCGGCAGGTCAACAAGTGCATGATTTGCGATTTTTAATAGGGGGTGTGTTTTACGGAGGGCGGCCATTAATGCTC…
Seabass*	Dicentrarchus labrax 99%	KU168696	atAgCtACGANGGCTGTCATTATTACTAAGAGGAGAAGGATTACCCCAATGTTTCATGTTTCTTTATACAGGTATGAGCCGTAGTACAGGCCTCGGCCAATGTGAAGATAAATACAAATAAAGAAGAAAGATGCACCATTGGCGTGAAGATTACGGATAAGTCAGCCATAGTTAACATCTCGACAAATGTGTGCGATGGAGGAGAAGGCTGTTGCGATATCTGAGGTATAATGTATAGCTAAAAATAGACCTGTAAGAATTTGGGAAATCAAGCATAGGCCTAAGAGCGAACCGAAATTTCATCAAACTGAAATATTTGAAGGGGCCGGCAGATCAACAAGTGCATGATTTGCGATTTTTAATAAGGGGTGTGTTTTACGGAGGGCGGCCATTAATGCT…
Seabass*	Dicentrarchus labrax 100%	KU168697	tAgNCTACGANGCTGTCATTATTACTAAGAGGAGAAGGATTACCCCGATGTTTCATGTTTCTTTATACAGGTATGAGCCGTAGTACAGGCCTCGGCCAATGTGAAGATAAATACAAATAAAGAAGAAAGATGCACCATTGGCGTGAAGATTACGAATAAGTCAGCCATAGTTAACATCTCGACAAATGTGTGCGATGGAGGAGAAGGCTGTTGCGATATCTGAAGTATAATGTATAGCTAAAAATAGACCTGTAAGAATTTGGGAAATCAAGCATAGGCCTAAGAGCGAACCGAAATTTCATCAAACTGAAATATTTGAAGGGGCCGGCAGGTCAACAAGTGCATGATTTGCGATTTTTAATAGGGGGTGTGTTTTACGGAGGGCGGCCATTAATGCTC…
Seabass*	Dicentrarchus labrax 100%	KU168698	ACGAtGCTGTCATTATTACTAAGAGGAGAAGGATTACCCCGATGTTTCATGTTTCTTTATACAGGTATGAGCCGTAGTACAGGCCTCGGCCAATGTGAAGATAAATACAAATAAAGAAGAAAGATGCACCATTGGCGTGAAGATTACGAATAAGTCAGCCATAGTTAACATCTCGACAAATGTGTGCGATGGAGGAGAAGGCTGTTGCGATATCTGAAGTATAATGTATAGCTAAAAATAGACCTGTAAGAATTTGGGAAATCAAGCATAGGCCTAAGAGCGAACCGAAATTTCATCAAACTGAAATATTTGAAGGGGCCGGCAGGTCAATAAGTGCATGATTTGCGATTTTTAATAGGGGGTGTGTTTTACGGAGGGCGGCCATTAATGCTCCCTTAG…
Seabass*	Dicentrarchus labrax 100%	KU168699	NACgAtGCTGTCATTATTACTAAGAGGAGAAGGATTACCCCGATGTTTCATGTTTCTTTATACAGGTATGAGCCGTAGTACAGGCCTCGGCCAATGTGAAGATAAATACAAATAAAGAAGAAAGATGCACCATTGGCGTGAAGATTACGAATAAGTCAGCCATAGTTAACATCTCGACAAATGTGTGCGATGGAGGAGAAGGCTGTTGCGATATCTGAAGTATAATGTATAGCTAAAAATAGACCTGTAAGAATTTGGGAAATCAAGCATAGGCCTAAGAGCGAACCGAAATTTCATCAAACTGAAATATTTGAAGGGGCCGGCAGGTCAACAAGTGCATGATTTGCGATTTTTAATAGGGGGTGTGTTTTACGGAGGGCGGCCATTAATGCTCCCTTA…
Seabass*	Dicentrarchus labrax 100%	KU168700	AAATCATGCACTTGTTGACCTGCCGGCCCCTTCAAATATTTCAGTTTGATGAAATTTCGGTTCGCTCTTAGGCCTATGCTTGATTTCCCAAATTCTTACAGGTCTATTTTTAGCTATACATTATACTTCAGATATCGCAACAGCCTTCTCCTCCATCGCACACATTTGTCGAGATGTTAACTATGGCTGACTTATTCGTAATCTTCACGCCAATGGTGCATCTTTCTTCTTTATTTGTATTTATCTTCACATTGGCCGAGGCCTGTACTACGGCTCATACCTGTATAAAGAAACATGAAACATCGGGGTAATCCTTCTCCTCTTAGTAATAATGACAGCCTTCGTAGGCTATGTGTTGCCCTGAGGACAAAT
Yellowtail	Seriola quinqueradiata 99.34%, Seriola lalandi 94.53%	KU168701	CCGAGCAGAACTTAGTCAACCCGGTGCTCTTCTGGGAGACGACCAAATTTATAACGTAATCGTTACAGCGCACGCGTTTGTAATAATTTTCTTTATAGTAATGCCAATTATGATTGGAGGGTTTGGGAACTGACTCATCCCCTTAATGATCGGGGCTCCCGATATAGCATTCCCCCGAATAAACAACATGAGCTTCTGACTCCTTCCCCCTTCATTCCTCCTACTTCTGGCCTCTTCAGGTGTTGAAGCCGGAGCTGGGACGGGTTGGACAGTCTACCCGCCCCTAGCCGGCAACCTTGCTCACGCGGGAGCATCCGTAGACTTAACAATTTTCTCCCTTCATTTAGCTGGGATCTCCTCAATTCTGGGGGCTATTAACTTTATCACAACCATCATCAA…
Yellowtail	Seriola quinqueradiata 99.51%, Seriola lalandi 94.75%	KU168702	ACTCATCCGAGCAGAACTTAGTCAACCCGGTGCTCTTCTGGGAGACGATCAAATTTATAACGTAATCGTTACAGCGCACGCGTTTGTAATAATTTTCTTTATAGTAATGCCAATTATAATTGGAGGGTTTGGGAACTGACTCATCCCCTTAATGATCGGGGCTCCCGATATAGCATTCCCCCGAATAAACAACATGAGCTTCTGACTCCTTCCCCCTTCATTCCTCCTACTTCTGGCCTCTTCAGGTGTTGAAGCCGGAGCTGGGACGGGTTGGACAGTCTACCCGCCCCTAGCCGGCAACCTTGCTCACGCGGGAGCATCCGTAGACTTAACAATTTTCTCCCTTCATTTAGCTGGGATCTCCTCAATTCTGGGGGCTATTAACTTTATCACAACCAT…
Yellowtail	Seriola quinqueradiata 99.84%, Seriola lalandi 94.9%	KU168703	TGGTCGGTACAGCTTTAAGTTTACTCATCCGAGCAGAACTTAGTCAACCCGGTGCTCTTCTGGGAGACGATCAAATTTATAACGTAATCGTTACAGCGCACGCGTTTGTAATAATTTTCTTTATAGTAATGCCAATTATGATTGGAGGGTTTGGGAACTGACTCATCCCCTTAATGATCGGGGCTCCCGATATAGCATTCCCCCGAATAAACAACATGAGCTTCTGACTCCTTCCCCCTTCATTCCTCCTACTTCTGGCCTCTTCAGGTGTTGAAGCCGGAGCTGGGACGGGTTGGACAGTCTACCCGCCCCTAGCCGGCAACCTTGCTCACGCGGGAGCATCCGTAGACTTAACAATTTTCTCCCTTCATTTAGCTGGGATCTCCTCAATTCTGGGGG…
Yellowtail	Seriola quinqueradiata 99.63%, Seriola lalandi 93.85%	KU168704	TtCGgTGccTGAgCCGGCATGGTCGGTACAGCTTTAAGTTTACTCATCCGAGCAGAACTTAGTCAACCCGGTGCTCTTCTGGGAGACGACCAAATTTATAACGTAATCGTTACAGCGCACGCGTTTGTAATAATTTTCTTTATAGTAATGCCAATTATGATTGGAGGGTTTGGGAACTGACTCATCCCCTTAATGATCGGGGCTCCCGATATAGCATTCCCCCGAATAAACAACATGAGCTTCTGACTCCTTCCCCCTTCATTCCTCCTACTTCTGGCCTCTTCAGGTGTTGAAGCCGGAGCTGGGACGGGTTGGACAGTCTACCCGCCCCTAGCCGGCAACCTTGCTCACGCGGGAGCATCCGTAGACTTAACAATTTTCTCCCTTCATTTAGCTGGG…
Yellowtail	Seriola quinqueradiata 99.69%	KU168705	GGCATGGTCGGTACAGCTTTAAGTTTACTCATCCGAGCAGAACTTAGTCAACCCGGTGCTCTTCTGGGAGACGATCAAATTTATAACGTAATCGTTACAGCGCACGCGTTTGTAATAATTTTCTTTATAGTAATGCCAATTATGATTGGAGGGTTTGGGAACTGACTCATCCCCTTAATGATCGGGGCTCCCGATATAGCATTCCCCCGAATAAACAACATGAGCTTCTGACTCCTTCCCCCTTCATTCCTCCTACTTCTGGCCTCTTCAGGTGTTGAAGCCGGAGCTGGGACGGGTTGGACAGTCTACCCGCCCCTAGCCGGCAACCTTGCTCACGCGGGAGCATCCGTAGACTTAACAATTTTCTCCCTTCATTTAGCTGGGATCTCCTCAATTCTG…
Yellowtail	Seriola lalandi 100%, Seriola zonata 99.34%	KU168706	TTTATAACGTAATCGTTACAGCGCACGCGTTTGTAATAATTTTCTTTATAGTAATGCCAATTATGATTGGAGGGTTCGGGAACTGACTCATCCCCTTGATGATTGGGGCTCCCGATATAGCATTCCCCCGAATAAACAATATGAGCTTCTGACTCCTTCCCCCTTCGTTCCTCCTACTTTTAGCCTCTTCAGGCGTTGAAGCCGGGGCCGGAACGGGTTGAACAGTCTACCCGCCTCTAGCCGGCAACCTCGCTCACGCAGGAGCATCCGTAGACTTAACAATTTTCTCCCTTCATTTAGCTGGAATCTCCTCAATTCTAGGAGCTATTAACTTTATTACGACCATCATCAACATGAAACCCCATGCCGTTTCCATGTACCAAATTCCCCTATTCGTTT…
Yellowtail	Seriola quinqueradiata 99.80%	KU168707	GGTGCTCTTCTGGGAGACGATCAAATTTATAACGTAATCGTTACAGCGCACGCGTTTGTAATAATTTTCTTTATAGTAATGCCAATTATGATTGGAGGGTTTGGGAACTGACTCATCCCCTTAATGATCGGGGCTCCCGATATAGCATTCCCCCGAATAAACAACATGAGCTTCTGACTCCTTCCCCCTTCATTCCTCCTACTTCTGGCCTCTTCAGGTGTTGAAGCCGGAGCTGGGACGGGTTGGACAGTCTACCCGCCCCTAGCCGGCAACCTTGCTCACGCGGGAGCATCCGTAGACTTAACAATTTTCTCCCTTCATTTAGCTGGGATCTCCTCAATTCTGGGGGCTATTAACTTTATCACAACCATCATCAACATAAAACCCCATGCCGTCTCT…
Yellowtail	Seriola quinqueradiata 99.79%	KU168708	GGTGCTCTTCTGGGAGACGATCAAATTTATAACGTAATCGTTACAGCGCACGCGTTTGTAATAATTTTCTTTATAGTAATGCCAATTATGATTGGAGGGTTTGGGAACTGACTCATCCCCTTAATGATCGGGGCTCCCGATATAGCATTCCCCCGAATAAACAACATGAGCTTCTGACTCCTTCCCCCTTCATTCCTCCTACTTCTGGCCTCTTCAGGTGTTGAAGCCGGAGCTGGGACGGGTTGGACAGTCTACCCGCCCCTAGCCGGCAACCTTGCTCACGCGGGAGCATCCGTAGACTTAACAATTTTCTCCCTTCATTTAGCTGGGATCTCCTCAATTCTGGGGGCTATTAACTTTATCACAACCATCATCAACATAAAACCCCATGCCGTCTCT…
Yellowtail	Seriola quinqueradiata 99.79%	KU168709	GGTGCTCTTCTGGGAGACGATCAAATTTATAACGTAATCGTTACAGCGCACGCGTTTGTAATAATTTTCTTTATAGTAATGCCAATTATGATTGGAGGGTTTGGGAACTGACTCATCCCCTTAATGATCGGGGCTCCCGATATAGCATTCCCCCGAATAAACAACATGAGCTTCTGACTCCTTCCCCCTTCATTCCTCCTACTTCTGGCCTCTTCAGGTGTTGAAGCCGGAGCTGGGACGGGTTGGACAGTCTACCCGCCCCTAGCCGGCAACCTTGCTCACGCGGGAGCATCCGTAGACTTAACAATTTTCTCCCTTCATTTAGCTGGGATCTCCTCAATTCTGGGGGCTATTAACTTTATCACAACCATCATCAACATAAAACCCCATGCCGTCTCT…
Yellowtail	Seriola quinqueradiata 99.77%	KU168710	GTCAACCCGGTGCTCTTCTGGGAGACGATCAAATTTATAACGTAATCGTTACAGCGCACGCGTTTGTAATAATTTTCTTTATAGTAATGCCAATTATGATTGGAGGATTTGGGAACTGACTCATCCCCTTAATGATCGGGGCTCCCGATATAGCATTCCCCCGAATAAACAACATGAGCTTCTGACTCCTTCCCCCTTCATTCCTCCTACTTCTGGCCTCTTCAGGTGTTGAAGCCGGAGCTGGGACGGGTTGGACAGTCTACCCGCCCCTAGCCGGCAACCTTGCTCACGCGGGAGCATCCGTAGACTTAACAATTTTCTCCCTTCATTTAGCTGGGATCTCCTCAATTCTGGGGGCTATTAACTTTATCACAACCATCATCAACATAAAACCCCATG…
Yellowtail	Seriola quinqueradiata 99.55%, Seriola lalandi 94.97%	KU168711	tggNatcgGTGccTGAgCCGGCATGGTCGGTACAGCTTTAAGTTTACTCATCCGAGCAGAACTTAGTCAACCCGGTGCTCTTCTGGGAGACGATCAAATTTATAACGTAATCGTTACAGCGCACGCGTTTGTAATAATTTTCTTTATAGTAATGCCAATTATGATTGGAGGGTTTGGGAACTGACTCATCCCCTTAATGATCGGGGCTCCCGATATAGCATTCCCCCGAATAAACAACATGAGCTTCTGACTCCTTCCCCCTTCATTCCTCCTACTTCTGGCCTCTTCAGGTGTTGAAGCCGGAGCTGGGACGGGTTGGACAGTCTACCCGCCCCTAGCCGGCAACCTTGCTCACGCGGGAGCATCCGTAGACTTAACAATTTTCTCCCTTCATTTAGC…
Yellowtail	Seriola quinqueradiata 99.7%, Seriola lalandi 94.9%	KU168712	tCGGTGCTGAGCCGGCATGGTCGGTACAGCTTTAAGTTTACTCATCCGAGCAGAACTTAGTCAACCCGGTGCTCTTCTGGGAGACGATCAAATTTATAACGTAATCGTTACAGCGCACGCGTTTGTAATAATTTTCTTTATAGTAATGCCAATTATGATTGGAGGGTTTGGGAACTGACTCATCCCCTTAATGATCGGGGCTCCCGATATAGCATTCCCCCGAATAAACAACATGAGCTTCTGACTCCTTCCCCCTTCATTCCTCCTACTTCTGGCCTCTTCAGGTGTTGAAGCCGGAGCTGGGACGGGTTGGACAGTCTACCCGCCCCTAGCCGGCAACCTTGCTCACGCGGGAGCATCCGTAGACTTAACAATTTTCTCCCTTCATTTAGCTGGGAT…
Mackerel	Scomber scombrus 99.80%	KU168713	GAGGGGGAGACCCAATCCTTTACCAACACCTATTCTGATTCTTCGTTTATAACGTAATTGTTACGGCCCATGCCTTCATTATAATCTTCTTTTTAGTAATACCAGTCATGATTGGAGGGTTCGGAAACTGACTTATCCCCCTAATGATCGGAGCCCCCGATATAGCGTTCCCCCGAATGAATAACATAAGCTTCTGACTTCTTCCCCCTTCTCTCCTACTACTCCTGTCTTCTTCGGCAGTTGAAGCTGGAGCCGGAACTGGCTGAACAGTCTACCCCCCACTAGCTGGTAACCTAGCGCATGCCGGGGCATCAGTTGACCTAACCATCTTCTCCCTTCACCTAGCAGGTGTTTCCTCAATTCTTGGGGCCATTAACTTCATCACAACAATTATTAATA…
Mackerel	Scomber scombrus 99.80%	KU168714	GGGTCCCTTCTCGGCGACGACCAAGTTTATAACGTAATTGTTACGGCCCATGCCTTCATTATAATCTTCTTTTTAGTAATACCAGTTATGATTGGAGGGTTCGGAAACTGACTTATCCCCCTAATGATTGGAGCCCCCGATATAGCGTTCCCCCGAATGAATAACATAAGCTTCTGACTTCTTCCCCCTTCTCTCCTACTACTCCTGTCTTCTTCGGCAGTTGAAGCTGGAGCCGGAACTGGCTGAACAGTCTACCCCCCACTAGCTGGTAACCTAGCGCATGCCGGGGCATCAGTTGACCTAACCATCTTCTCCCTTCACCTAGCAGGTGTTTCCTCAATTCTTGGGGCCATTAACTTCATCACAACAATTATTAATATGAAACCTGCAGGTATCTCT…
Mackerel	Scomber scombrus 100%	KU168715	AATGAATAACATAAGCTTCTGACTTCTTCCCCCTTCTCTCCTACTACTCCTGTCTTCTTCGGCAGTTGAAGCTGGAGCCGGAACTGGCTGAACAGTCTACCCCCCACTAGCTGGTAACCTAGCGCATGCCGGGGCATCAGTTGACCTAACCATCTTCTCCCTTCACCTAGCAGGTGTTTCCTCAATTCTTGGGGCCATTAACTTCATCACAACAATTATTAATATGAAACCTGCAGGTATCTCTCAATACCAAACCCCTCTGTTCGTCTGAGCAGTCCTAATTACAGCTGTTCTTCTACTCCTATCTCTGCCAGTCCTTGCTGCCGGCATTACAATGCTTCTAACTGATCGAAATCTTAATACCACTTTCTTTGACCCC
Mackerel	Scomber scombrus 99.72%	KU168716	AATGAATAACATAAGCTTCTGACTTCTTCCCCCTTCTCTCCTACTACTCCTGTCTTCTTCGGCAGTTGAAGCTGGAGCCGGAACTGGCTGAACAGTCTACCCCCCACTAGCTGGTAACCTAGCGCATGCCGGGGCATCAGTTGACCTAACCATCTTCTCCCTTCACCTAGCAGGTGTTTCCTCAATTCTTGGGGCCATTAACTTCATCACAACAATTATTAATATGAAACCTGCAGGTATCTCTCAGTACCAAACCCCTCTGTTCGTCTGAGCAGTCCTAATTACAGCTGTTCTTCTACTCCTATCTCTGCCAGTCCTTGCTGCCGGCATTACAATGCTTCTAACTGATCGAAA
Mackerel	Scomber scombrus 100%	KU168717	GGCCTTAAGCTTGCTTATCCGAGCCGAACTAAGCCAACCAGGGTCCCTTCTCGGCGACGACCAAGTTTATAACGTAATTGTTACGGCCCATGCCTTCATTATAATCTTCTTTTTAGTAATACCAGTCATGATTGGAGGGTTCGGAAACTGACTTATCCCCCTAATGATCGGAGCCCCCGATATAGCGTTCCCCCGAATGAATAACATAAGCTTCTGACTTCTTCCCCCTTCTCTCCTACTACTCCTGTCTTCTTCGGCAGTTGAAGCTGGAGCCGGAACTGGCTGAACAGTCTACCCCCCACTAGCTGGTAACCTAGCGCATGCCGGGGCATCAGTTGACCTAACCATCTTCTCCCTTCACCTAGCAGGTGTTTCCTCAATTCTTGGGGCCATTAACTT…
Mackerel	Scomber scombrus 100%	KU168718	CTCGGCGACGACCAAGTTTATAACGTAATTGTTACGGCCCATGCCTTCATTATAATCTTCTTTTTAGTAATACCAGTCATGATTGGAGGGTTCGGAAACTGACTTATCCCCCTAATGATCGGAGCCCCCGATATAGCGTTCCCCCGAATGAATAACATAAGCTTCTGACTTCTTCCCCCTTCTCTCCTACTACTCCTGTCTTCTTCGGCAGTTGAAGCTGGAGCCGGAACTGGCTGAACAGTCTACCCCCCACTAGCTGGTAACCTAGCGCATGCCGGGGCATCAGTTGACCTAACCATCTTCTCCCTTCACCTAGCAGGTGTTTCCTCAATTCTTGGGGCCATTAACTTCATCACAACAATTATTAATATGAAACCTGCAGGTATCTCTCAATACCAA…
Mackerel	Scomber scombrus 100%	KU168719	GGGTCCCTTCTCGGCGACGACCAAGTTTATAACGTAATTGTTACGGCCCATGCCTTCATTATAATCTTCTTTTTAGTAATACCAGTCATGATTGGAGGGTTCGGAAACTGACTTATCCCCCTAATGATCGGAGCCCCCGATATAGCGTTCCCCCGAATGAATAACATAAGCTTCTGACTTCTTCCCCCTTCTCTCCTACTACTCCTGTCTTCTTCGGCAGTTGAAGCTGGAGCCGGAACTGGCTGAACAGTCTACCCCCCACTAGCTGGTAACCTAGCGCATGCCGGGGCATCAGTTGACCTAACCATCTTCTCCCTTCACCTAGCAGGTGTTTCCTCAATTCTTGGGGCCATTAACTTCATCACAACAATTATTAATATGAAACCTGCAGGTATCTCT…
Mackerel	Scomber scombrus 100%	KU168720	GGGTCCCTTCTCGGCGACGACCAAGTTTATAACGTAATTGTTACGGCCCATGCCTTCATTATAATCTTCTTTTTAGTAATACCAGTCATGATTGGAGGGTTCGGAAACTGACTTATCCCCCTAATGATCGGAGCCCCCGATATAGCGTTCCCCCGAATGAATAACATAAGCTTCTGACTTCTTCCCCCTTCTCTCCTACTACTCCTGTCTTCTTCGGCAGTTGAAGCTGGAGCCGGAACTGGCTGAACAGTCTACCCCCCACTAGCTGGTAACCTAGCGCATGCCGGGGCATCAGTTGACCTAACCATCTTCTCCCTTCACCTAGCAGGTGTTTCCTCAATTCTTGGGGCCATTAACTTCATCACAACAATTATTAATATGAAACCTGCAGGTATCTCT…
Seabream	Sparus aurata 100%	KU168721	ttGCNTGGGcCGGaTAGTAGGAACTGCcCTaaGCCTGCTCATTCGAGCTGAGCTTAGCCAgNNgGCgCtCTCCTTGGAGACGACCAGATTTATAATGTAATTGTTACAGCACATGCGTTTGTAATAATTTTCTTTATAGTTATACCAATTATGATCGGTGGCTTTGGGAACTGATTAATTCCACTTATGATCGGTGCCCCTGACATAGCATTCCCCCGAATAAATAACATGAGCTTCTGACTTCTTCCTCCCTCGTTCCTCCTTCTATTGGCCTCTTCTGGAGTTGAAGCCGGAGCCGGCACCGGATGAACAGTTTACCCCCCGCTGGCAGGAAACCTTGCCCACGCAGGTGCATCAGTTGATTTAACAATCTTTTCCCTTCATTTAGCTGGAATTTCA…
Seabream	Sparus aurata 100%	KU168722	GCTTGGGCCGGATAGTAGGAACTGCCCTacGccTGCTCATTCGAGCTGAGCTTAGCCAGCCTGGCGCTCTCCTTGGAGACGACCAGATTTATAATGTAATTGTTACAGCACATGCGTTTGTAATAATTTTCTTTATAGTTATACCAATTATGATCGGTGGCTTTGGGAACTGATTAATTCCACTTATGATCGGTGCCCCTGACATAGCATTCCCCCGAATAAATAACATGAGCTTCTGACTTCTTCCTCCCTCGTTCCTCCTTCTATTGGCCTCTTCTGGAGTTGAAGCCGGAGCCGGCACCGGATGAACAGTTTACCCCCCGCTGGCAGGAAACCTTGCCCACGCAGGTGCATCAGTTGATTTAACAATCTTTTCCCTTCATTTAGCTGGAATTTCAT…
Seabream	Sparus aurata 100%	KU168723	TGGCGCTCTCCTTGGAGACGACCAGATTTATAATGTAATTGTTACAGCACATGCGTTTGTAATAATTTTCTTTATAGTTATACCAATTATGATCGGTGGCTTTGGGAACTGATTAATTCCACTTATGATCGGTGCCCCTGACATAGCATTCCCCCGAATAAATAACATGAGCTTCTGACTTCTTCCTCCCTCGTTCCTCCTTCTATTGGCCTCTTCTGGAGTTGAAGCCGGAGCCGGCACCGGATGAACAGTTTACCCCCCGCTGGCAGGAAACCTTGCCCACGCAGGTGCATCAGTTGATTTAACAATCTTTTCCCTTCATTTAGCTGGAATTTCATCTATTCTTGGCGCTATTAATTTTATCACTACCATTATTAACATAAAACCCCCAGCCATTTC…
Swordfish	Makaira nigricans 99.52%	KU168724	GgGTcGCtaGAGCCGGAtGGTGGGCACTGCCCTGAGCCTTCTAATTCGAGCTGAACTTAGCCAACCTGGCGCTTTACTAGGCGATGATCAAATTTATAACGTAATCGTTACAGCCCACGCCTTCGTAATAATCTTCTTTATAGTAATGCCAATTATGATTGGAGGTTTCGGAAACTGACTGATTCCTCTAATGATCGGAGCCCCAGACATGGCCTTCCCTCGAATAAACAACATGAGCTTTTGACTGCTCCCTCCCTCATTCCTTCTTCTCCTCGCCTCCTCCGGAGTTGAAGCCGGGGCCGGCACAGGGTGAACCGTTTACCCGCCTCTAGCAGGTAACCTAGCCCACGCAGGAGCATCTGTTGACCTAACTATTTTTTCCCTCCATCTAGCTGGTAT…
Swordfish	Xiphias gladius 100%	KU168725	tGAtTaGGTGCTTGAGCCGGTATAGTAGGCACAGCCCTAAGTCTACTAATCCGAGCAGAACTCAGCCAACCTGGCGCCCTACTAGGGGATGACCAGATTTACAACGTAATCGTTACAGCTCACGCCTTTGTAATGATCTTCTTTATAGTAATGCCAATCATGATTGGAGGGTTCGGAAATTGACTAATTCCCCTAATGATTGGAGCCCCCGATATAGCATTCCCTCGAATGAATAACATAAGCTTCTGACTCCTCCCTCCATCATTCCTCCTCCTCCTTGCTTCTTCTGGAGTTGAAGCTGGCGCTGGAACCGGGTGAACTGTCTACCCTCCTCTAGCAGGTAACCTAGCCCACGCAGGTGCATCTGTTGACCTTACCATCTTCTCCCTTCACCTAGCT…
King Fish	Seriola lalandi 100%, Seriola zonata 99.38%	KU168726	GGTGCTCTTCTGGGAGACGATCAAATTTATAACGTAATCGTTACAGCGCACGCGTTTGTAATAATTTTCTTTATAGTAATGCCAATTATGATTGGAGGGTTCGGGAACTGACTCATCCCCTTGATGATTGGGGCTCCCGATATAGCATTCCCCCGAATAAACAATATGAGCTTCTGACTCCTTCCCCCTTCGTTCCTCCTACTTTTAGCCTCTTCAGGCGTTGAAGCCGGGGCCGGAACGGGTTGAACAGTCTACCCGCCTCTAGCCGGCAACCTCGCTCACGCAGGAGCATCCGTAGACTTAACAATTTTCTCCCTTCATTTAGCTGGAATCTCCTCAATTCTAGGAGCTATTAACTTTATTACGACCATCATCAACATGAAACCCCATGCCGTTTCC…
King Fish (Tasmanian)	Seriola lalandi 100%, Seriola zonata 99.43%	KU168727	CCCGGTGCTCTTCTGGGAGACGATCAAATTTATAACGTAATCGTTACAGCGCACGCGTTTGTAATAATTTTCTTTATAGTAATGCCAATTATGATTGGAGGGTTCGGGAACTGACTCATCCCCTTGATGATTGGGGCTCCCGATATAGCATTCCCCCGAATAAACAATATGAGCTTCTGACTCCTTCCCCCTTCGTTCCTCCTACTTTTAGCCTCTTCAGGCGTTGAAGCCGGGGCCGGAACGGGTTGAACAGTCTACCCGCCTCTAGCCGGCAACCTCGCTCACGCAGGAGCATCCGTAGACTTAACAATTTTCTCCCTTCATTTAGCTGGAATCTCCTCAATTCTAGGAGCTATTAACTTTATTACGACCATCATCAACATGAAACCCCATGCCGTT…
Barramundi²	Lates calcarifer 100%	KU168728	CCCCTATTCGTCTGAGCAGTCTTGATTACAGCCGTTCTTCTTCTACTCTCCCTCCCAGTCCTAGCCGCCGGTATCACCATGCTTCTTACANTCGTAACCTAAACACAGCATTCTTCGATCCTGCCGGAGGGGGAGACCCGATTCTCTATCAACATCTGTTCTGATTCTGGTATTACAATGCTCCTTACAGACCGAAACCTAAATACAACCTTCTTCGACCCTGCAG
Black Cod	Anoplopoma fimbria 100%	KU168729	TTGGtGATGAGCCGGAATAGTAGGCACAGCATTAAGCCTTCTCATCCGAGCAGAGTTAAGCCAACCTGGCGCCCTCTTGGGCGACGACCAAATCTATAACGTAATTGTTACTGCACATGCTTTCGTAATAATTTTCTTTATAGTAATGCCAATTATGATCGGCGGGTTTGGAAACTGACTCATCCCACTAATGATCGGAGCTCCCGATATAGCATTCCCTCGAATAAACAACATAAGCTTTTGATTACTCCCCCCTTCTTTCCTGCTTCTTCTCGCCTCTTCTGGTGTAGAAGCCGGGGCAGGGACAGGGTGAACAGTATACCCCCCTCTCGCCAGTAACTTGGCCCATGCCGGAGCATCCGTTGATCTAACCATCTTCTCCCTCCACTTAGCAGGTAT…
Cobia²	Rachycentron canadum 100%	KU168730	TTAACATAAAACCACCAACTGTGACTATGTACCAAATTCCCCTCTTCGTATGGGCTGTCCTAATCACTGCCGTCCTTCTCCTCCTCTCACTCCCAGTCCTGGCTGCTGGCATTACTATACTGCTTACAGACCGAAATTTAAATACAGCCTTCTTTGACCCTGCAGGAGGGGGTGACCCAATTCTATATCAACACTTATTCTGATTCTTCGGCCACCCCGAAGTCTAAACCTAACTATTTTCTCACTTCACTTAGCAGGGGTTTCCTCAATTCTTGGGGCAATTAACT
Flying Fish eggs	Clupea harengus 100%	KU168731	GGGGCTCTCCTTGGAGACGACCAGATCTATAATGTTATTGTTACTGCACATGCCTTCGTAATAATTTTCTTTATAGTAATGCCGATTCTAATTGGAGGGTTTGGAAACTGACTAATTCCTCTTATGATCGGAGCGCCAGATATGGCATTCCCTCGAATAAACAATATGAGCTTCTGACTACTTCCCCCCTCATTCCTCCTACTACTAGCCTCCTCCGGAGTTGAAGCCGGGGCGGGGACCGGGTGAACGGTATATCCTCCTCTGTCAGGAAATCTGGCCCATGCAGGAGCATCAGTTGACCTAACCATTTTTTCACTTCATCTAGCAGGTATTTCCTCTATTCTAGGGGCCATTAATTTCATTACCACAATTATTAATATGAAACCACCCGCAATCTCA…
Snapper	Sparus aurata 100%	KU168732	TGCTCATTCGAGCTGAGCTTAGCCAGCCTGGCGCTCTCCTTGGAGACGACCAGATTTATAATGTAATTGTTACAGCACATGCGTTTGTAATAATTTTCTTTATAGTTATACCAATTATGATCGGTGGCTTTGGGAACTGATTAATTCCACTTATGATCGGTGCCCCTGACATAGCATTCCCCCGAATAAATAACATGAGCTTCTGACTTCTTCCTCCCTCGTTCCTCCTTCTATTGGCCTCTTCTGGAGTTGAAGCCGGAGCCGGCACCGGATGAACAGTTTACCCCCCGCTGGCAGGAAACCTTGCCCACGCAGGTGCATCAGTTGATTTAACAATCTTTTCCCTTCATTTAGCTGGAATTTCATCTATTCTTGGCGCTATTAATTTTATCACTACCA…
